# Supplementary material for: Triangular prism-shaped β-peptoid helices as unique biomimetic scaffolds
Source: PubMed Central journal article supplement (PMC4432622; doi:10.1038/ncomms8013), 2015-05-06
Supplement: ncomms8013-s1.pdf [file ncomms8013-s1.pdf]

## Supplementary Figures

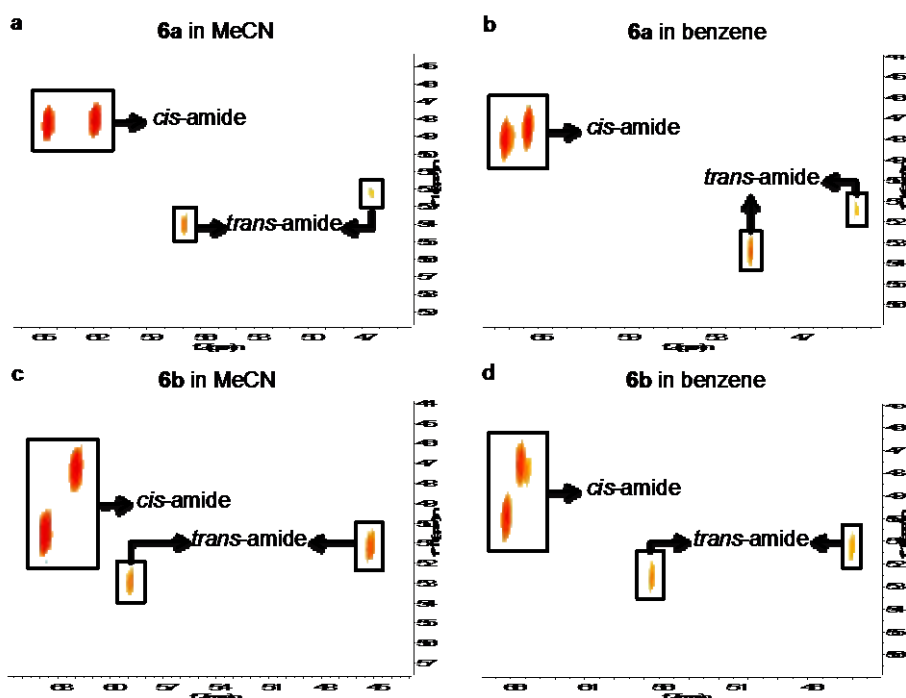

Supplementary Figure 1 | HSQC spectra. Spectra showing the side chain methine proton from (a) compound 6a in MeCN- $d_3$ , (b) compound 6a in benzene- $d_6$ , (c) compound 6b in MeCN- $d_3$ , and (d) compound 6b in benzene- $d_6$ .

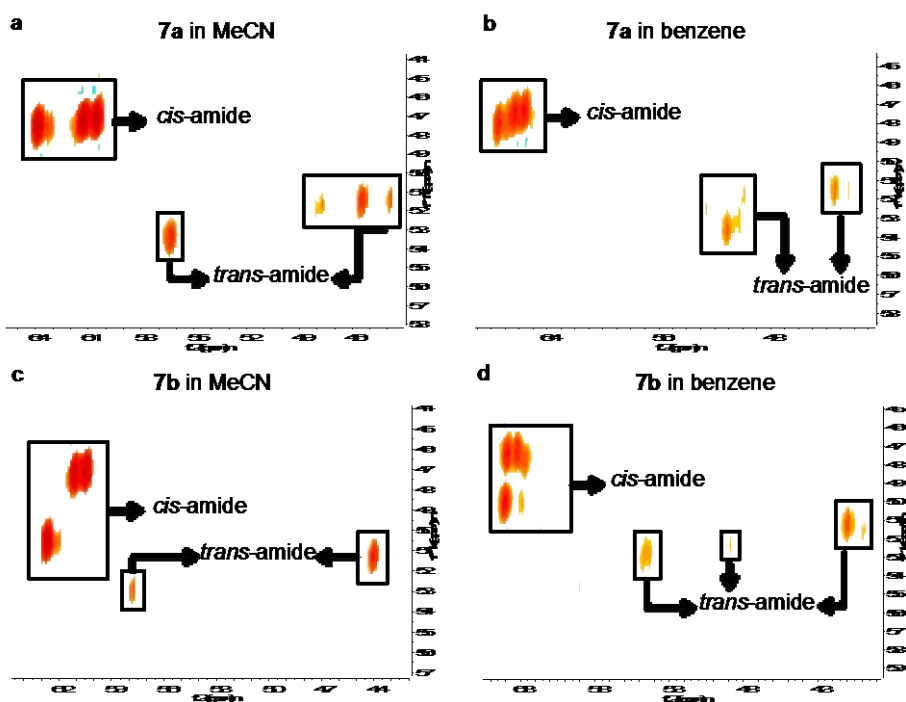

Supplementary Figure 2 | HSQC spectra. Spectra showing the side chain methine proton from (a) compound 7a in MeCN- $d_3$ , (b) compound 7a in benzene- $d_6$ , (c) compound 7b in MeCN- $d_3$ , and (d) compound 7b in benzene- $d_6$ .

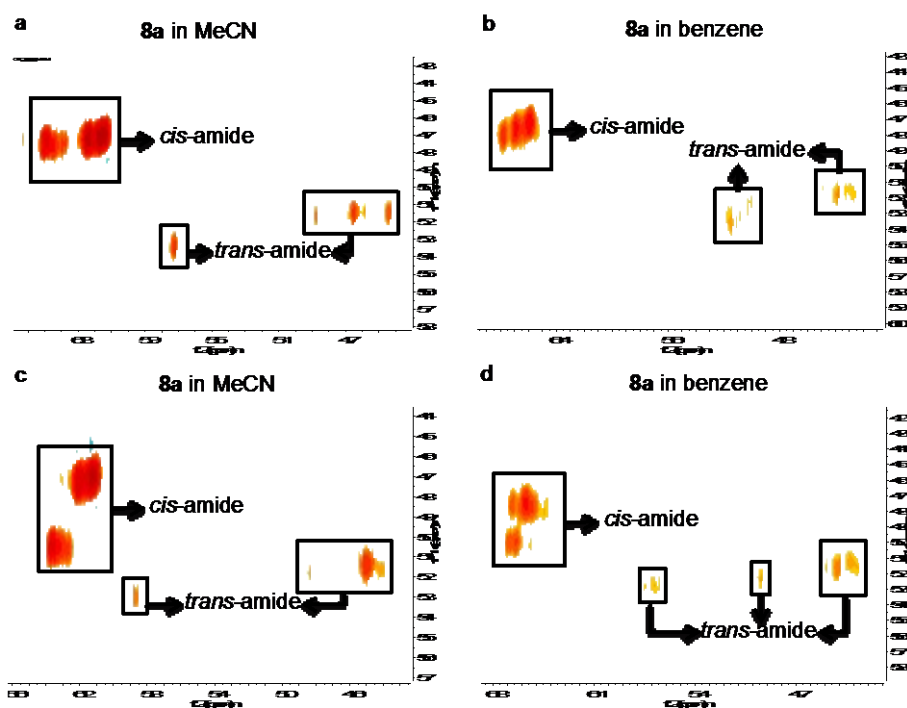

**Supplementary Figure 3 | HSQC spectra.** Spectra showing the side chain methine proton from (a) compound **8a** in MeCN- $d_3$ , (b) compound **8a** in benzene- $d_6$ , (c) compound **8b** in MeCN- $d_3$ , and (d) compound **8b** in benzene- $d_6$ .

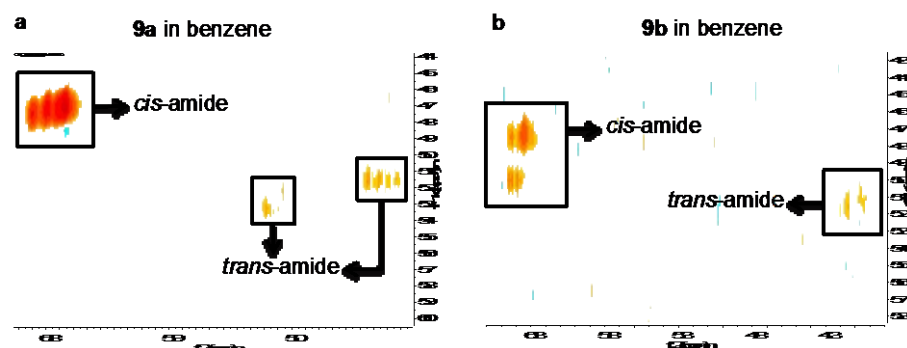

**Supplementary Figure 4 | HSQC spectra.** Spectra showing the side chain methine proton from (a) compound **9a** in MeCN- $d_3$ , (b) compound **9a** in benzene- $d_6$ , (c) compound **9b** in MeCN- $d_3$ , and (d) compound **9b** in benzene- $d_6$ .

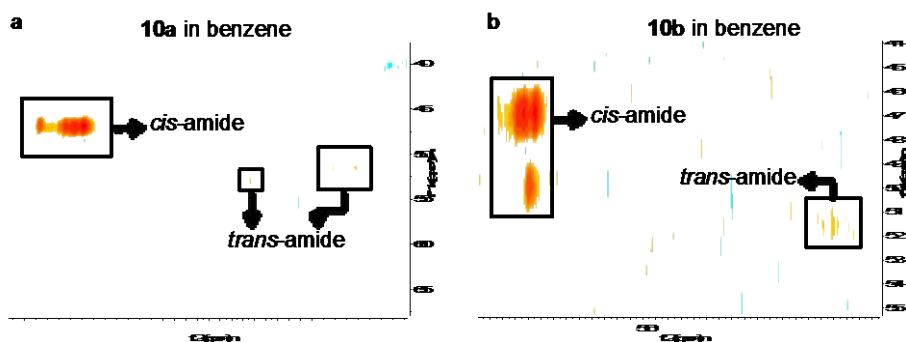

**Supplementary Figure 5 | HSQC spectra.** Spectra showing the side chain methine proton from (a) compound **10a** in MeCN- $d_3$ , (b) compound **10a** in benzene- $d_6$ , (c) compound **10b** in MeCN- $d_3$ , and (d) compound **10b** in benzene- $d_6$ .

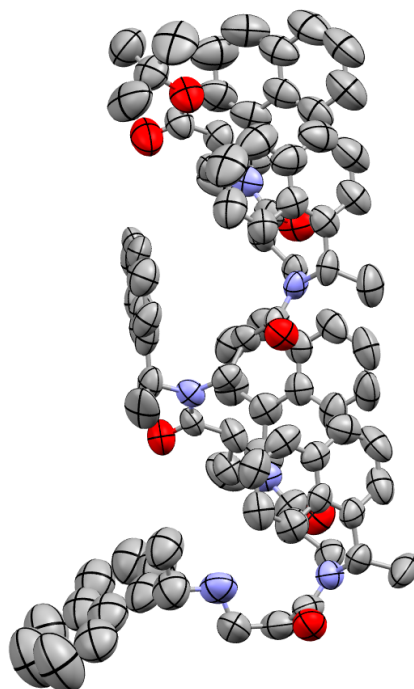

**Supplementary Figure 6 | The asymmetric unit in crystal 10c.** The 50% probability ellipsoid representation was prepared using the Mercury software.<sup>1</sup>

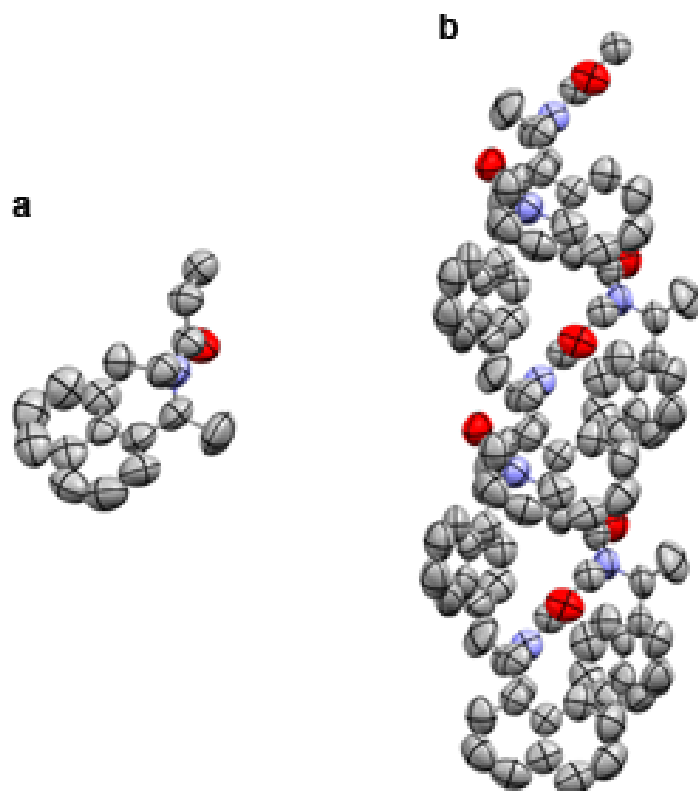

**Supplementary Figure 7 | The asymmetric unit in crystal 10a.** (a) The asymmetric unit. (b) The hexamer generated by imposing crystallographic symmetry. The 50% probability ellipsoid representation was prepared using the Mercury software.<sup>1</sup>

**a**

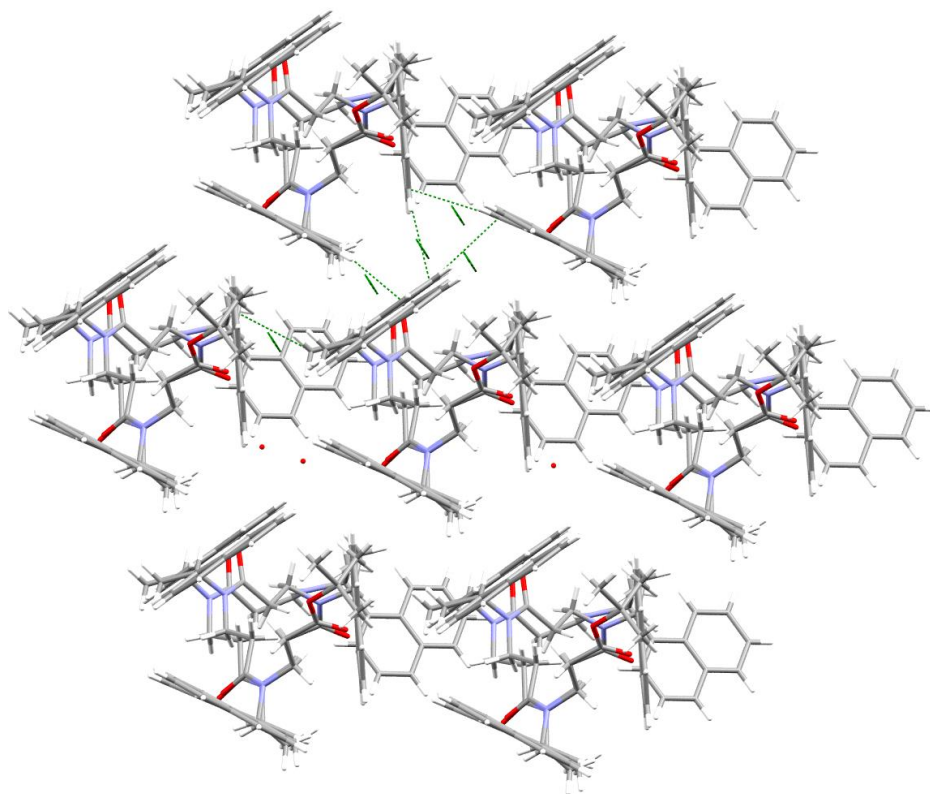

**b**

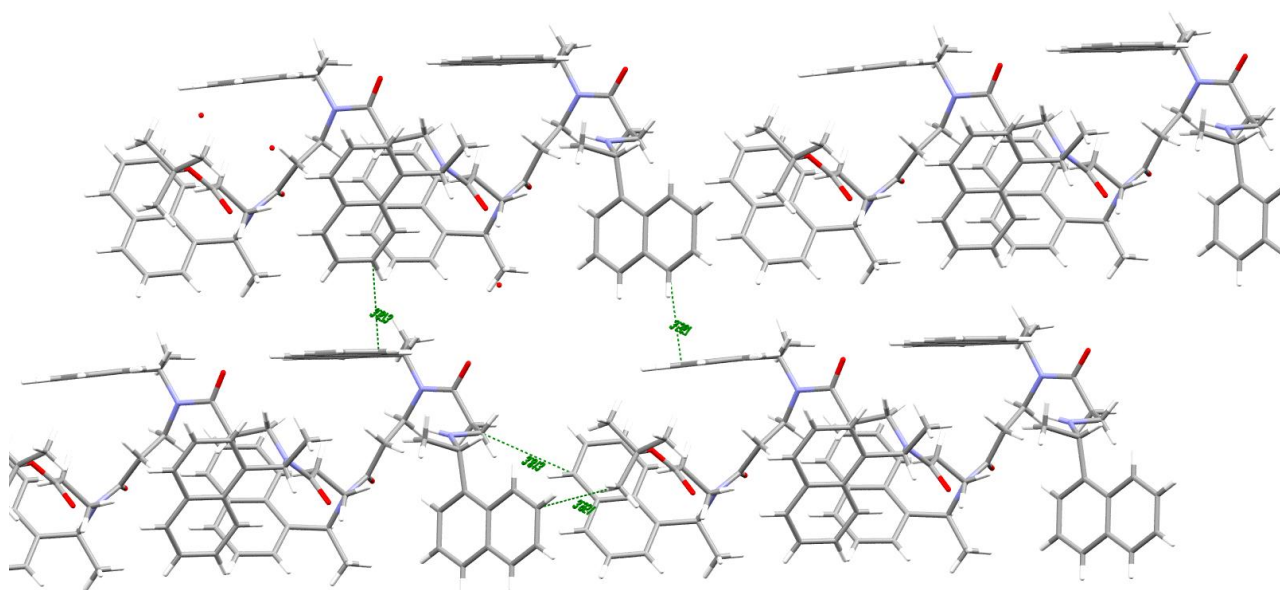

**Supplementary Figure 8 | Crystal packing of 10c.** (a) Viewed along the helical axis. The helices arrange in a pseudo-trigonal manner. (b) Perpendicular to the helical axis. The figure was prepared using the Mercury software.<sup>1</sup>

**a**

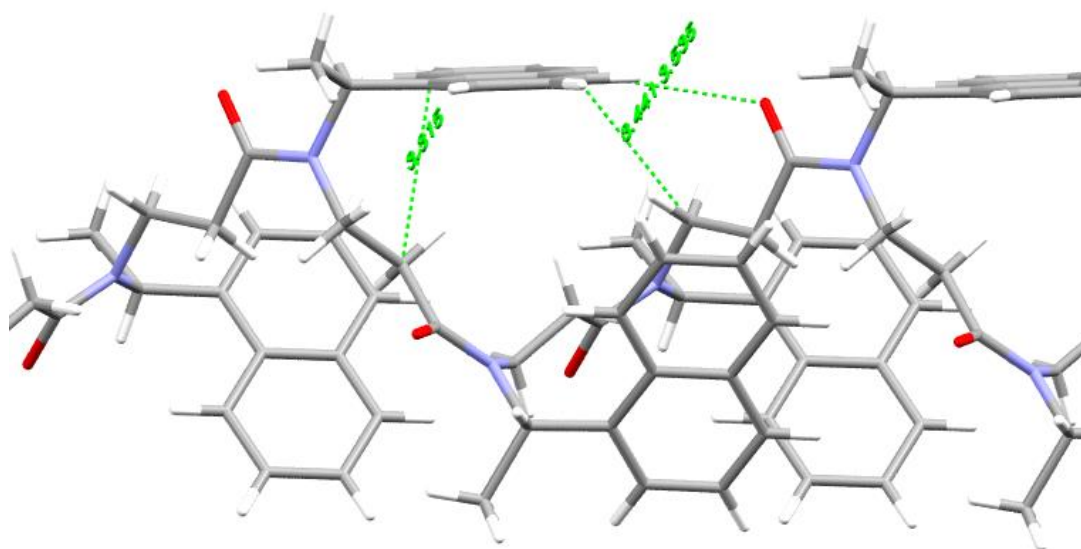

**b**

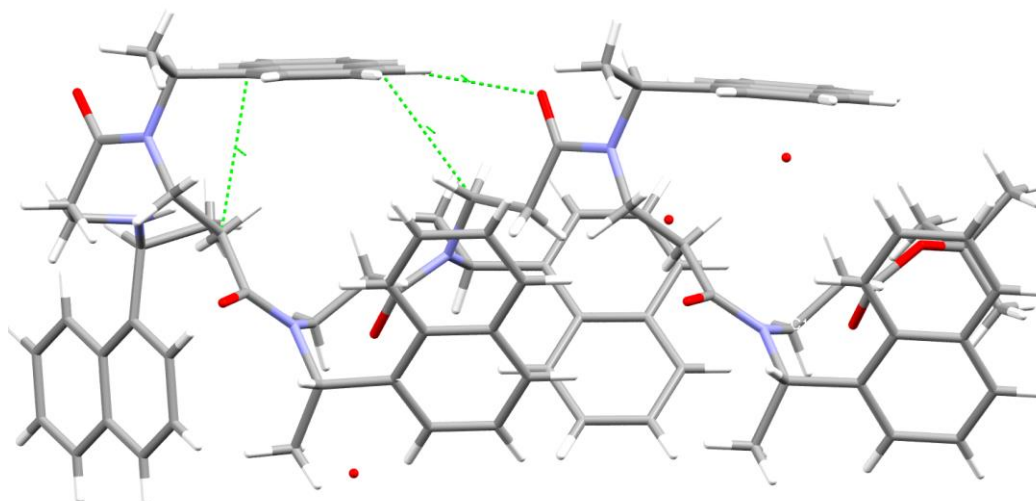

**Supplementary Figure 9 | Backbone–side chain distances. (a) Naphthyl–backbone interactions in compound 10a. (b) Naphthyl–backbone interactions in compound 10c.**

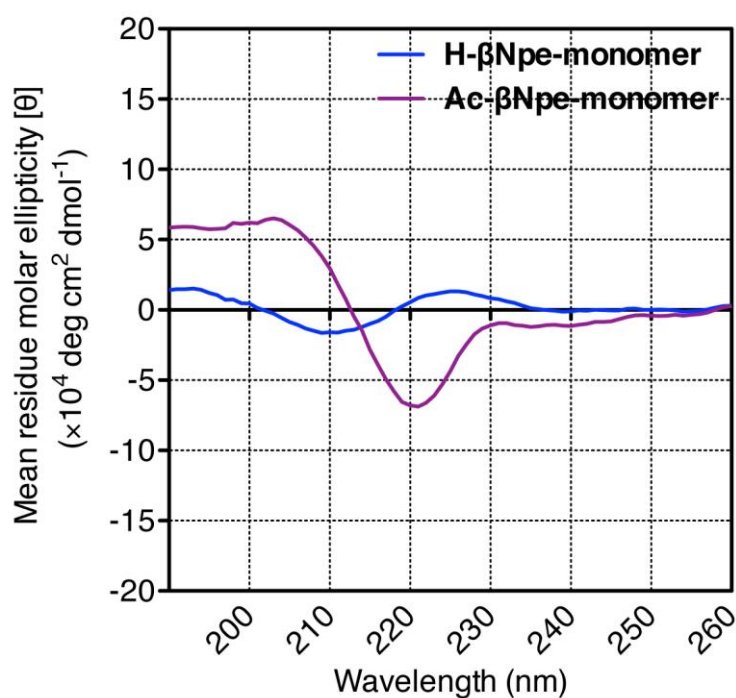

**Supplementary Figure 10 | CD spectra.** Spectra obtained for the acylated and non-acylated (*S*)-1-(1-naphthyl)ethyl-containing monomers in acetonitrile (60  $\mu$ M) at room temperature.

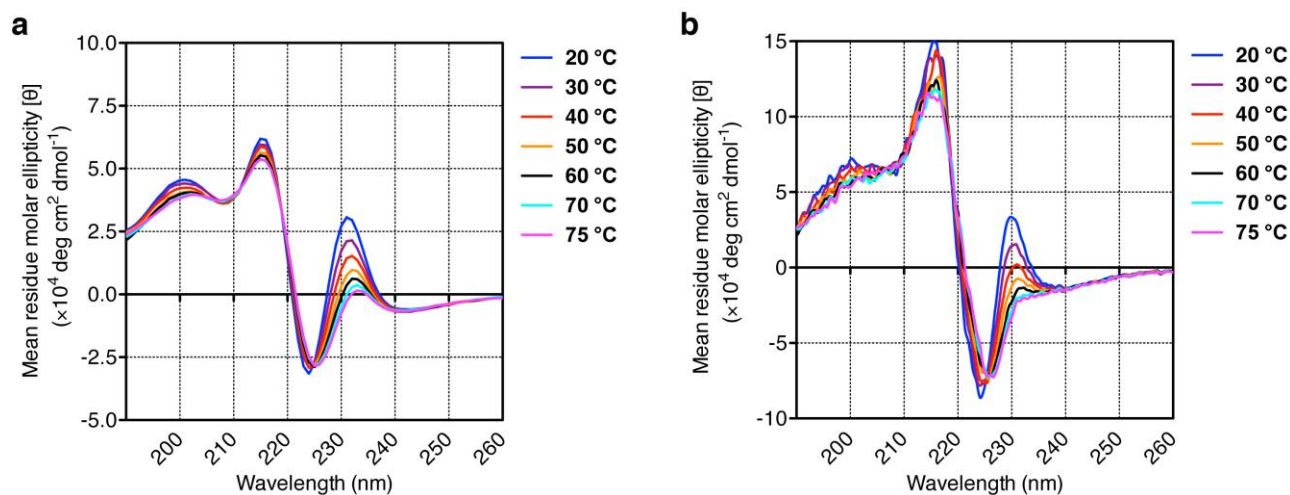

**Supplementary Figure 11 | CD spectra.** (a) Compound **10a** and (b) compound **10b** at varying temperatures in acetonitrile ( $\sim$ 60  $\mu$ M).

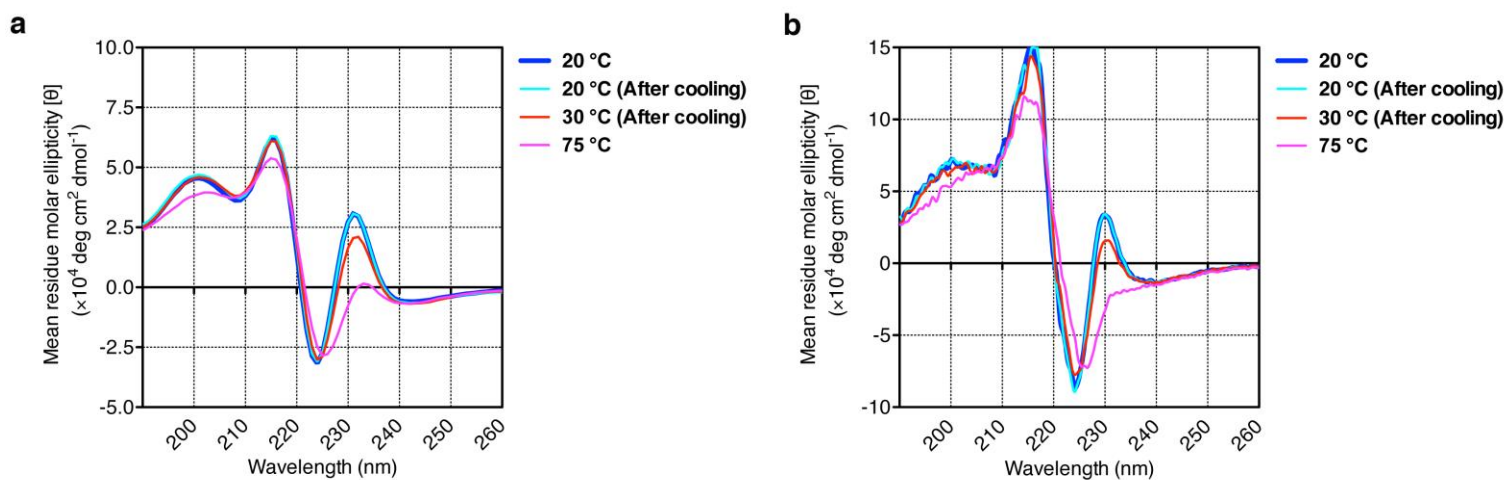

**Supplementary Figure 12 | CD spectra.** (a) Compound **10a** and (b) compound **10b** at varying temperatures in acetonitrile ( $\sim 60 \mu\text{M}$ ) upon cooling the sample back down to room temperature.

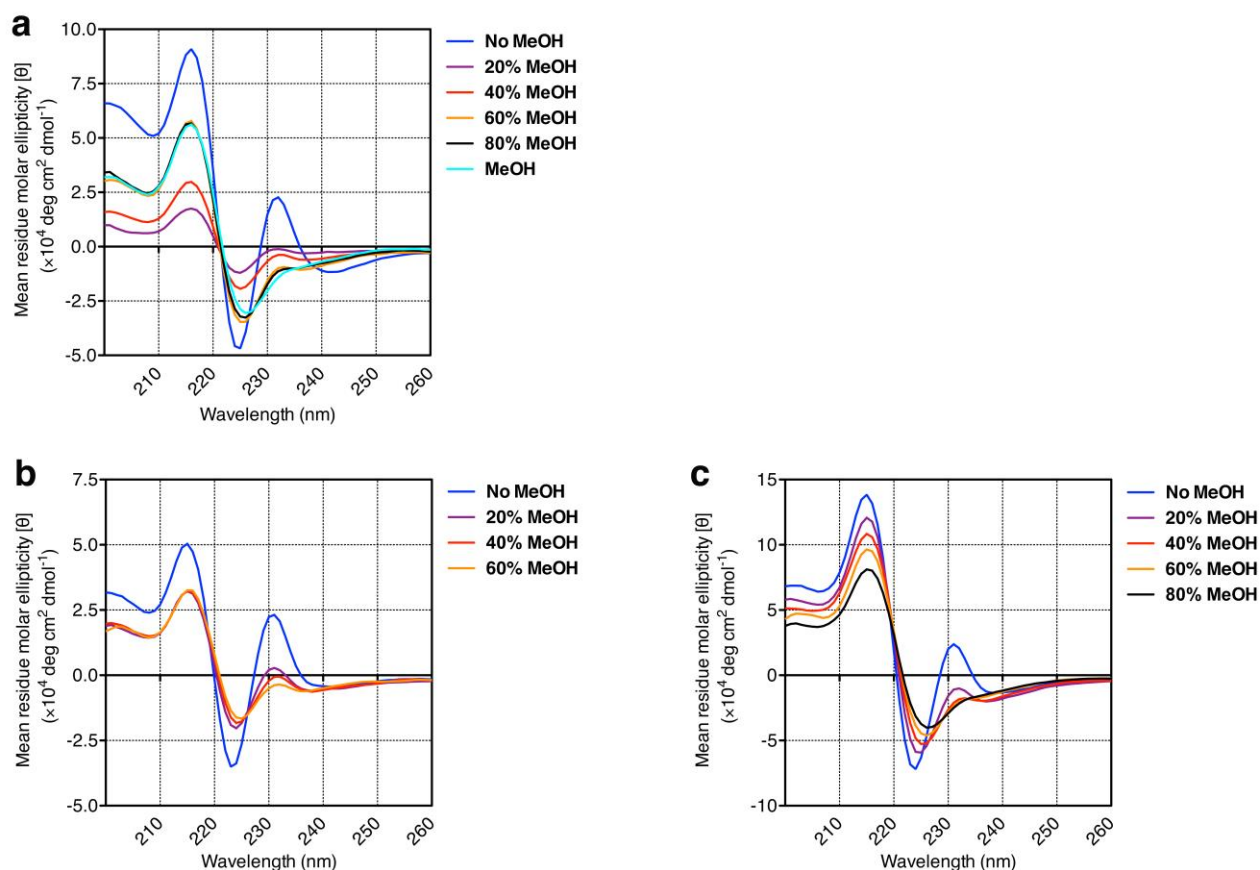

**Supplementary Figure 13 | CD spectra.** (a) Compound **9a**, (b) compound **10a**, and (c) compound **10b** recorded at varying concentrations of methanol ( $60 \mu\text{M}$  solutions). For the hexamers, poor solubility precluded spectra from being obtained at the highest concentrations of MeOH.



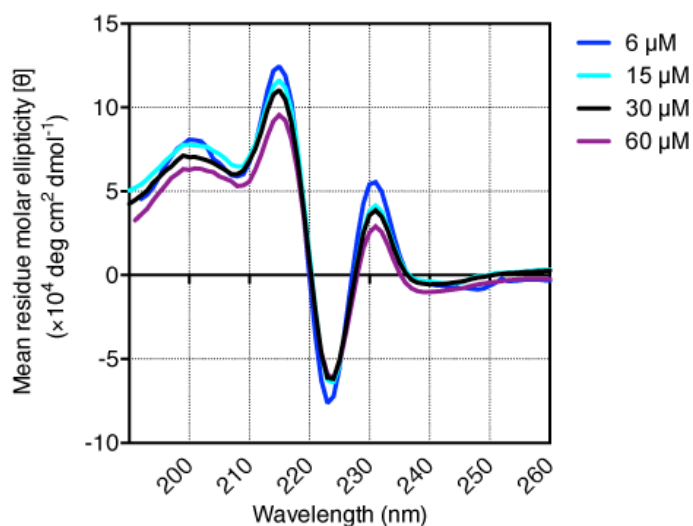

**Supplementary Figure 14 | CD spectra.** Compound **10a** recorded at varying concentrations in acetonitrile (60  $\mu\text{M}$  solutions).

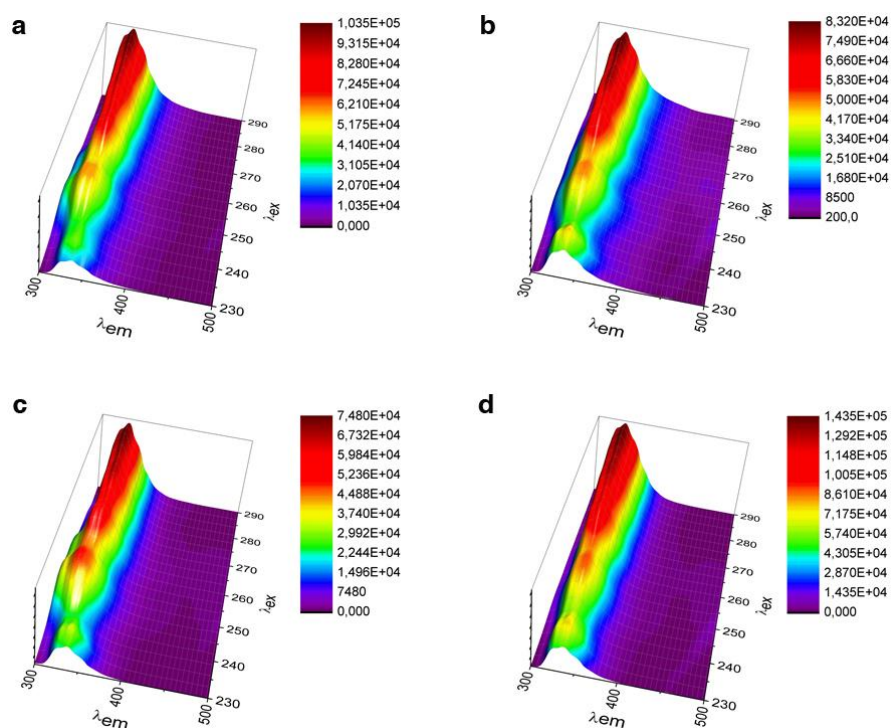

**Supplementary Figure 15 | Fluorescence emission spectra.** (a) Spectrum recorded for compound **10a** in acetonitrile or (b) in MeOH–acetonitrile (3:2). (c) Spectrum recorded for and compound **6a** in acetonitrile or (d) in MeOH–acetonitrile (3:2) at room temperature (60  $\mu\text{M}$  solutions). The intensities are shown in arbitrary units (a.u.).

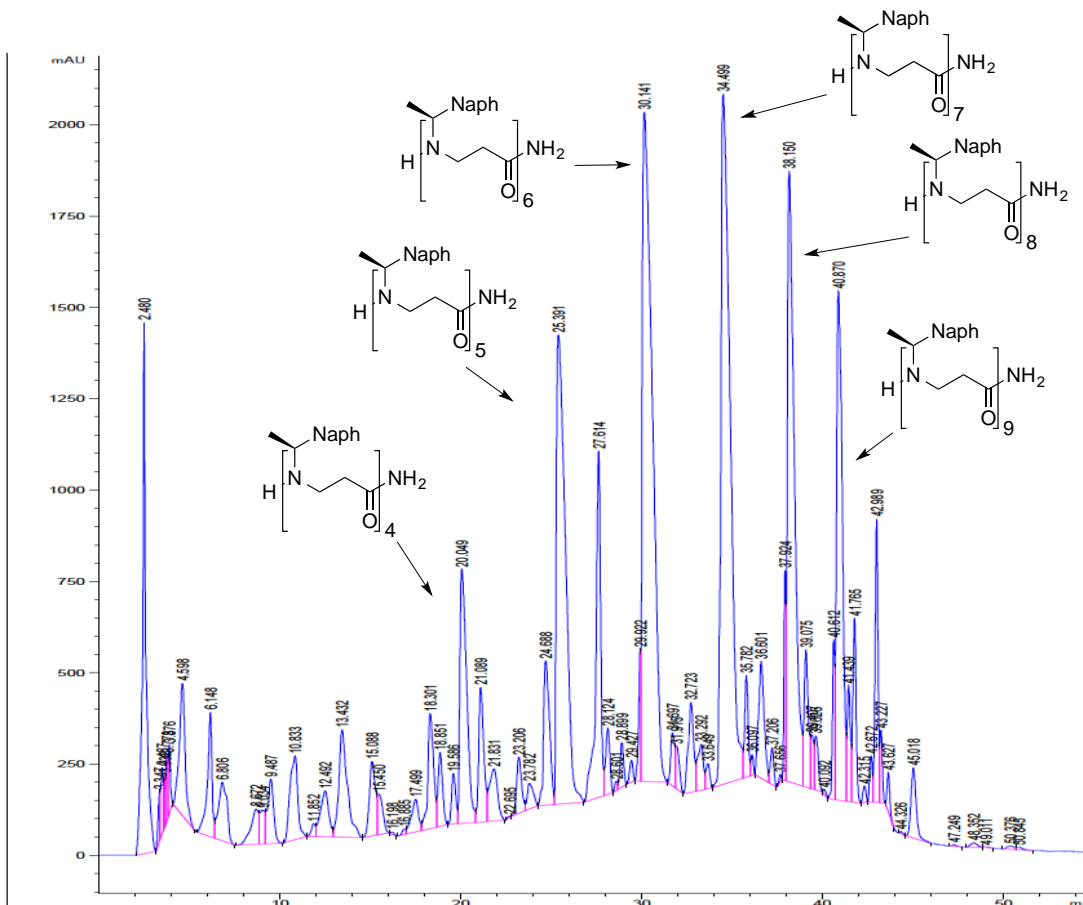

**Supplementary Figure 16 | UV chromatogram of crude mixture from solid-phase synthesis.** The chromatogram was obtained after sub-unit solid-phase synthesis aimed at compound **10e**. Compounds of four and five residues were identified by UPLC-MS, but were not collected during preparative HPLC purification.

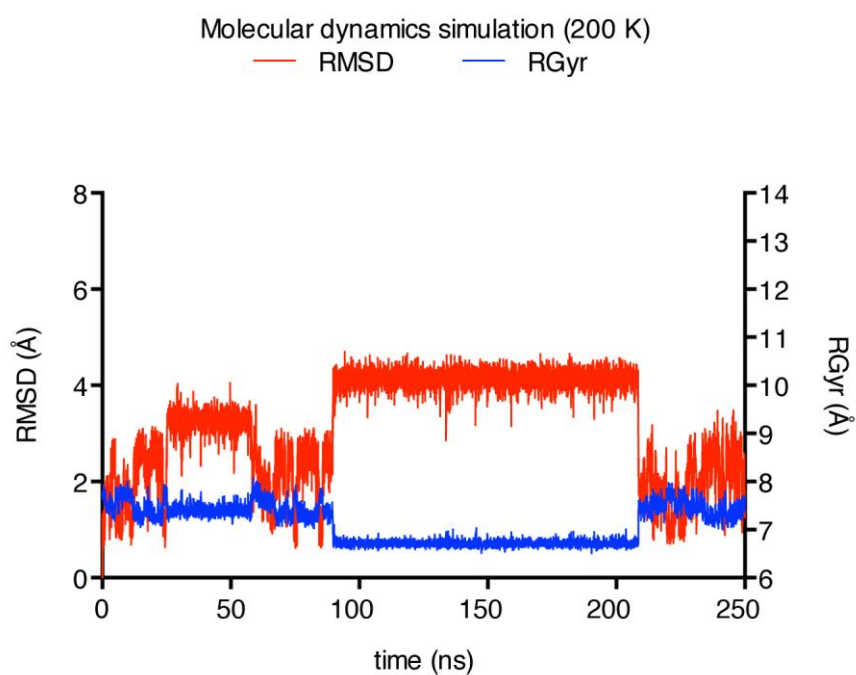

**Supplementary Figure 17 | Molecular dynamics simulation.** Root-mean square deviation (RMSD) and gyration radius (RGyr) during MD simulation (250 ns) of compound **10a** at 200 K.

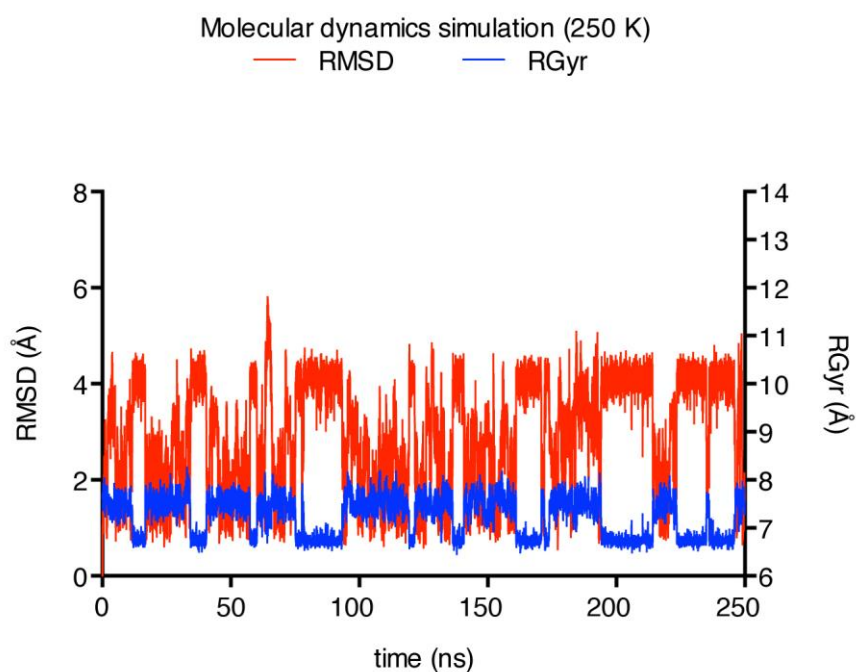

**Supplementary Figure 18 | Molecular dynamics simulation.** Root-mean square deviation (RMSD) and gyration radius (RGyr) during MD simulation (250 ns) of compound **10a** at 250 K.

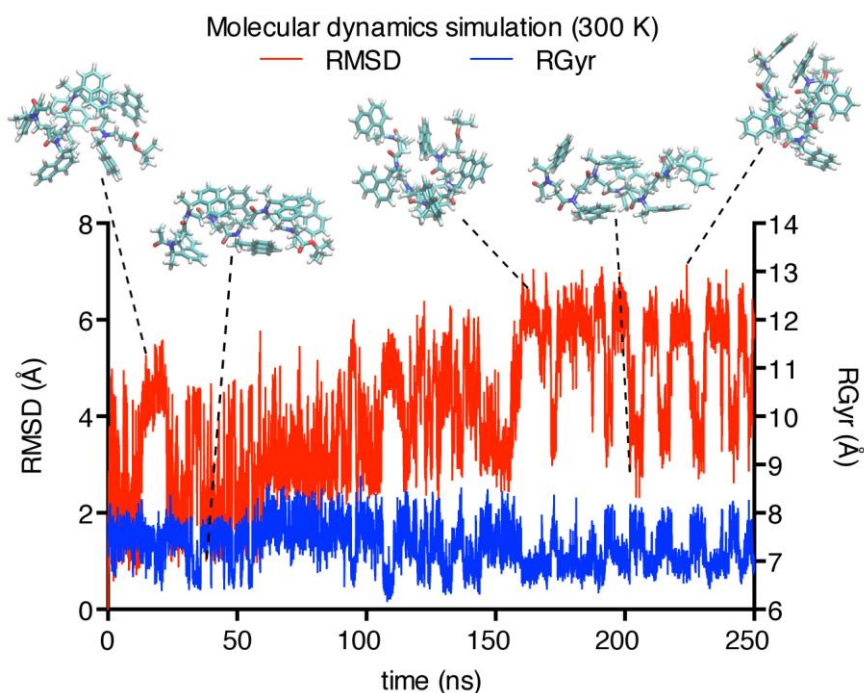

**Supplementary Figure 19 | Molecular dynamics simulation.** Root-mean square deviation (RMSD) and gyration radius (RGyr) during MD simulation (250 ns) of compound **10a** at 300 K. Representative conformations are shown to illustrate the folded and unfolded states of the helical structure throughout the simulation.

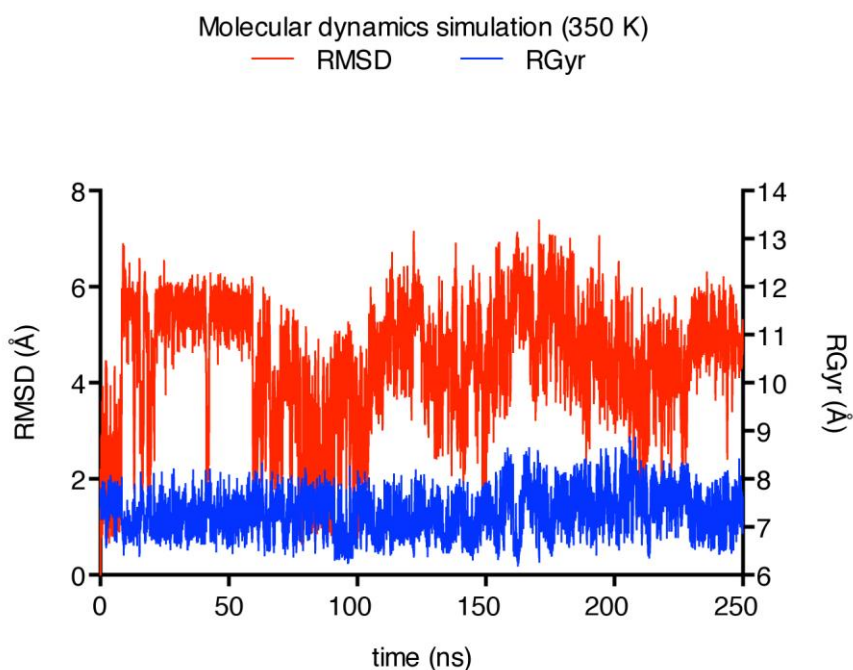

**Supplementary Figure 20 | Molecular dynamics simulation.** Root-mean square deviation (RMSD) and gyration radius (RGyr) during MD simulation (250 ns) of compound **10a** at 350 K.

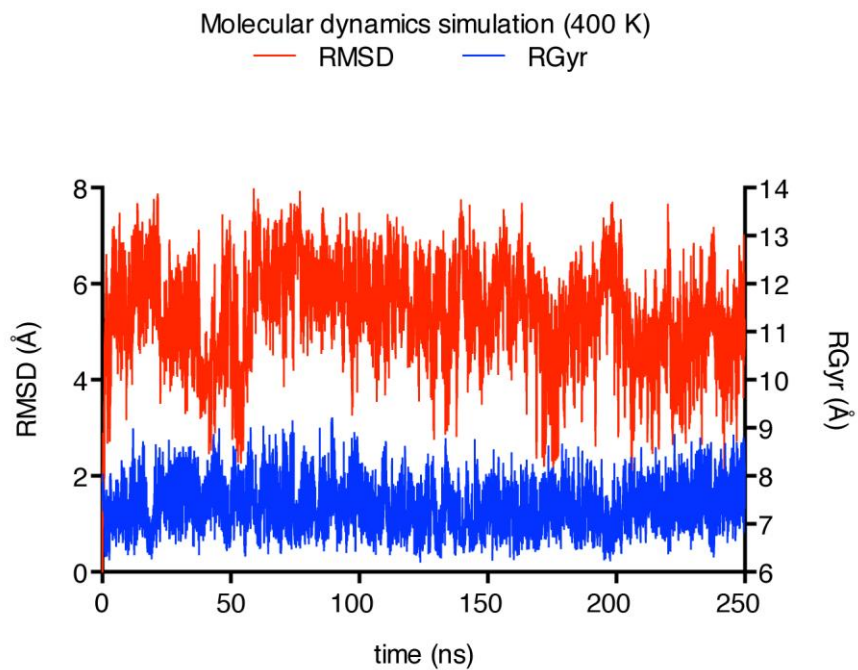

**Supplementary Figure 21 | Molecular dynamics simulation.** Root-mean square deviation (RMSD) and gyration radius (RGyr) during MD simulation (250 ns) of compound **10a** at 400 K.

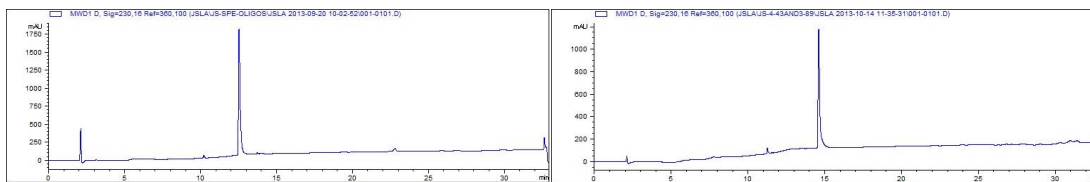

Compound 1a

Com pound 1b

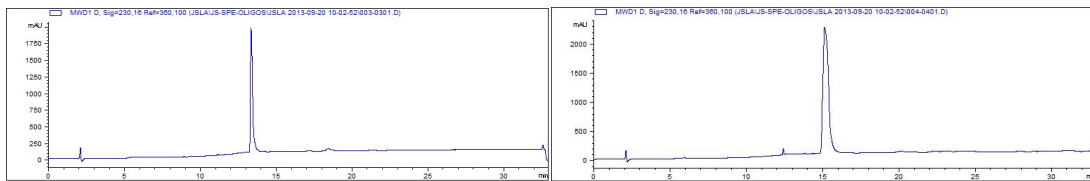

Compound 2a

Com pound 2b

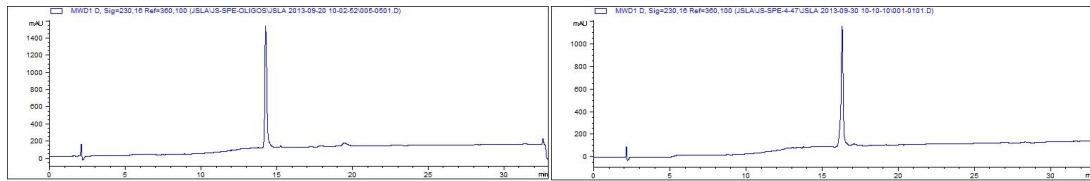

Compound 3a

Com pound 3b

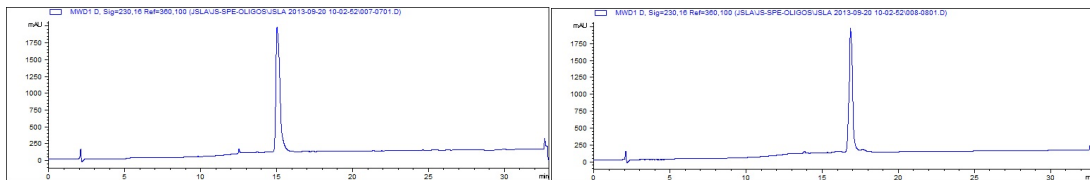

Compound 4a

Com pound 4b

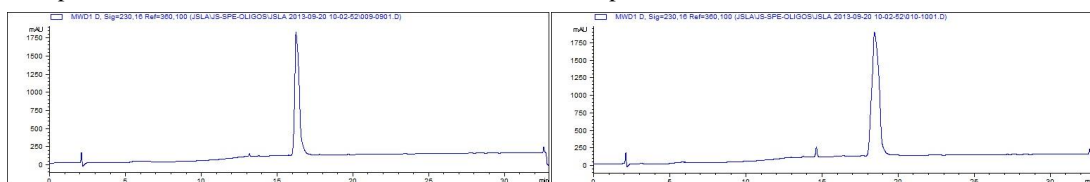

Compound 5a

Com pound 5b

**Supplementary Figure 22 | HPLC traces of compounds 1a–5b.**

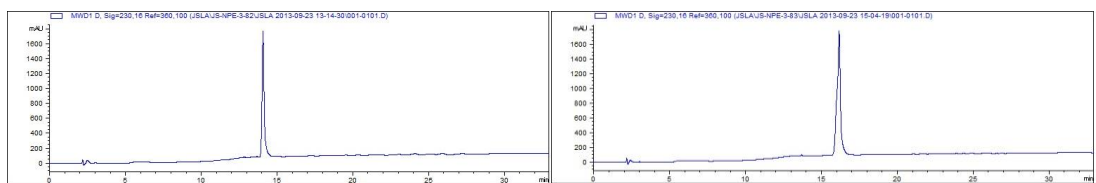

Compound 6a

Com pound 6b

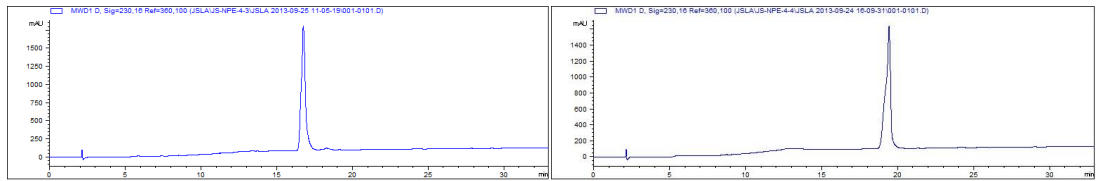

Compound 7a

Com pound 7b

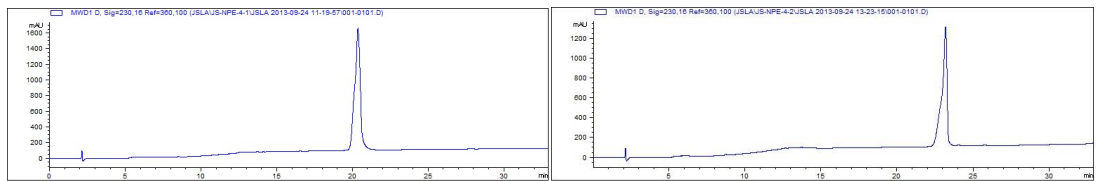

Compound 8a

Com pound 8b

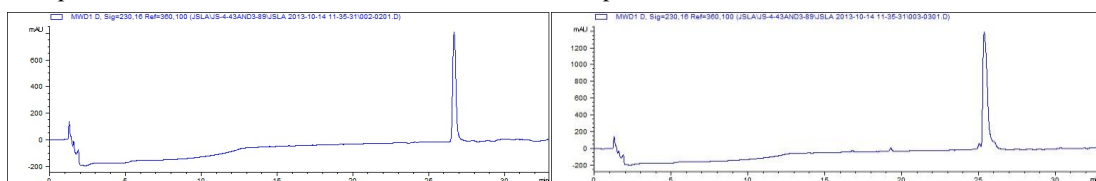

Compound 9a

Com pound 9b

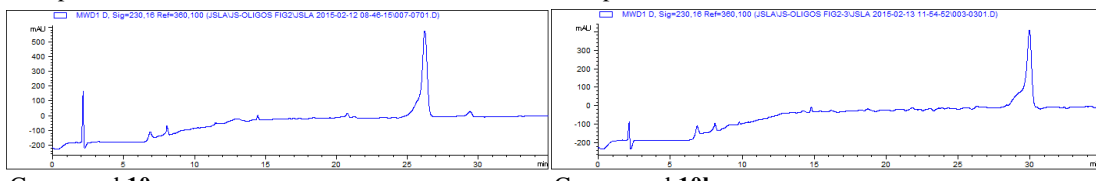

Compound 10a

Com pound 10b

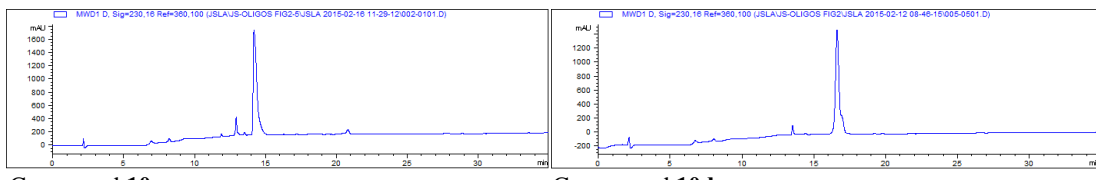

Compound 10c

Com pound 10d

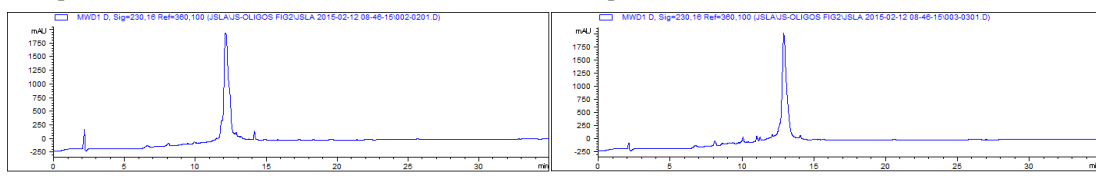

Compound 10e

Com pound 11

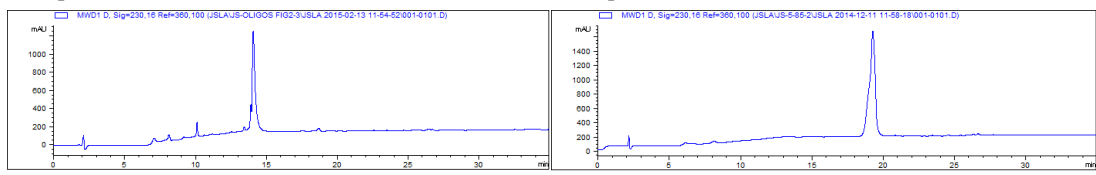

Compound 12

Com pound 16

**Supplementary Figure 23 | HPLC traces of compounds 6a–16.**

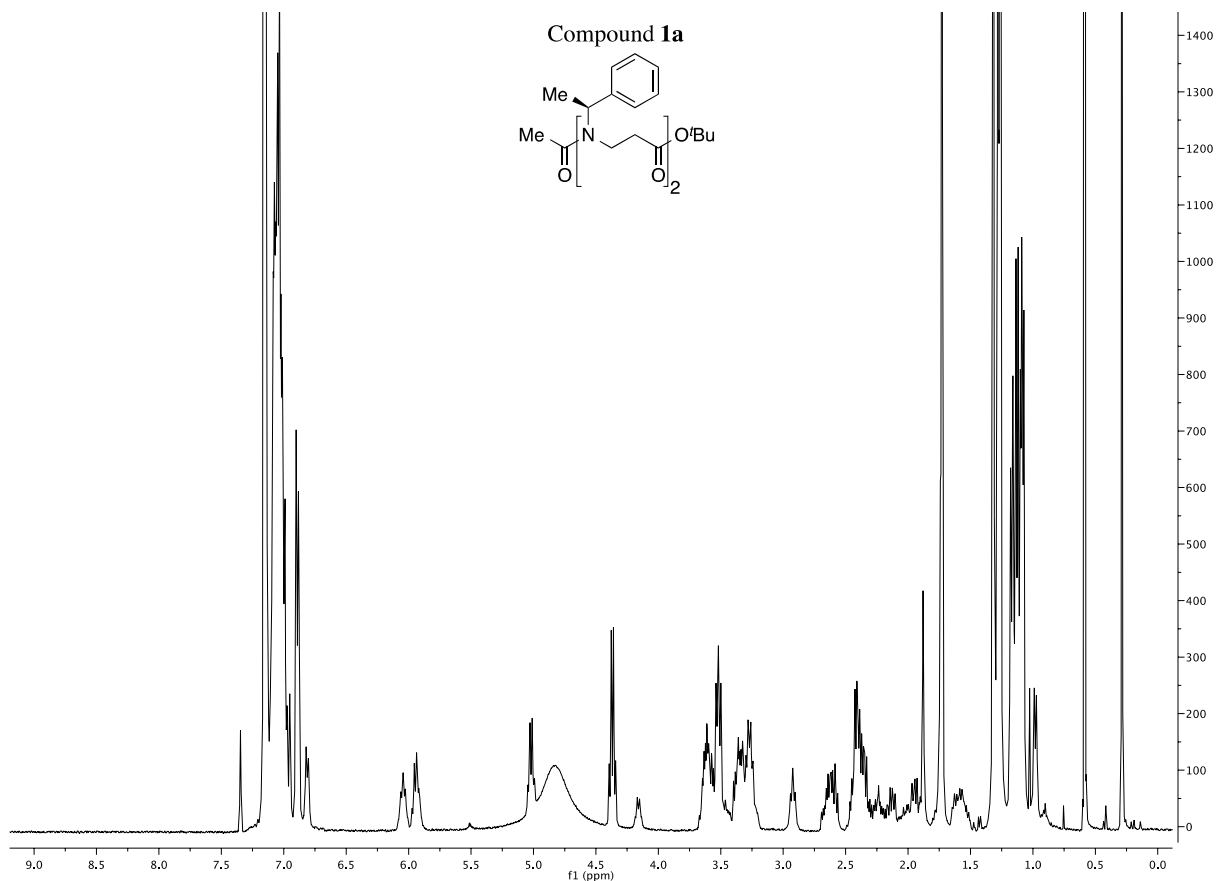

**Supplementary Figure 24 |  $^1\text{H}$  NMR spectrum of compound 1a.** The spectrum was recorded in benzene- $d_6$  at room temperature.

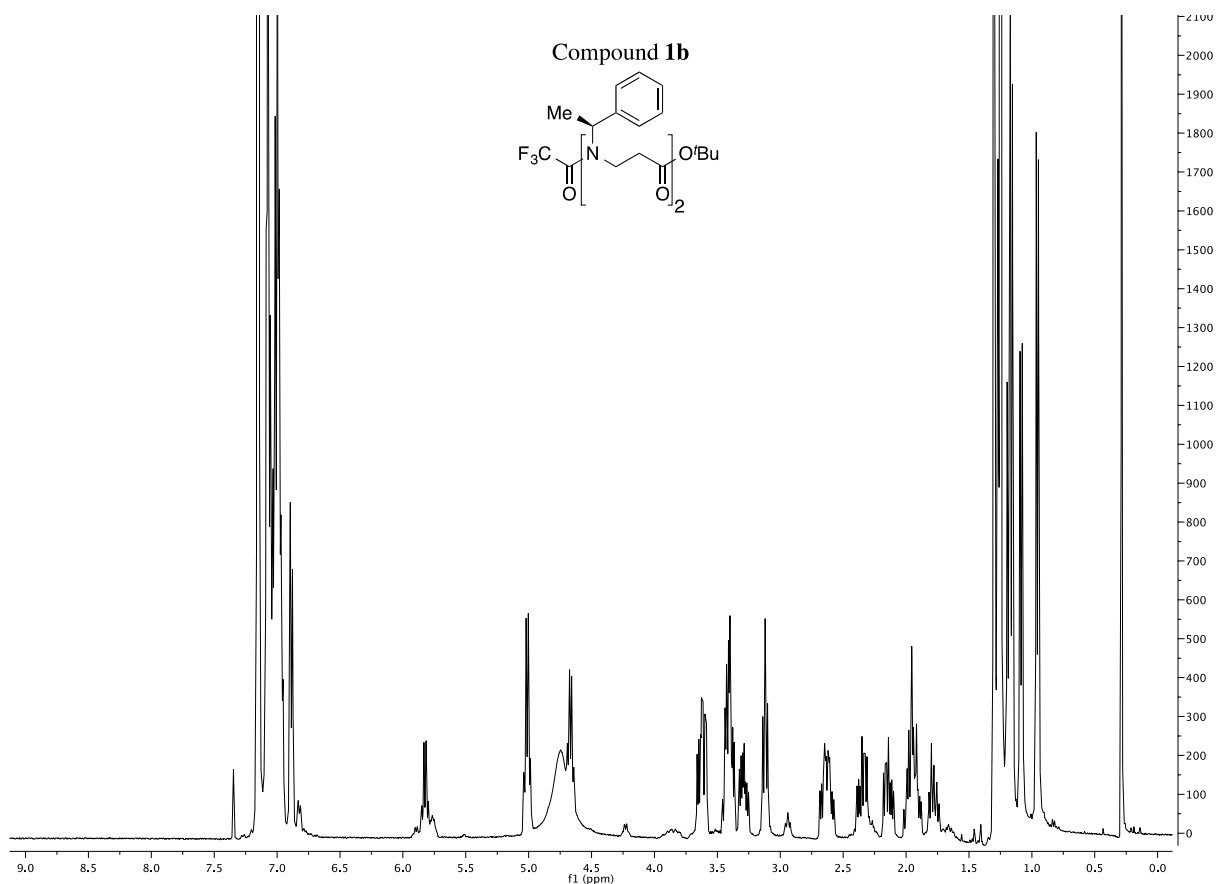

**Supplementary Figure 25 |  $^1\text{H}$  NMR spectrum of compound 1b.** The spectrum was recorded in benzene- $d_6$  at room temperature.



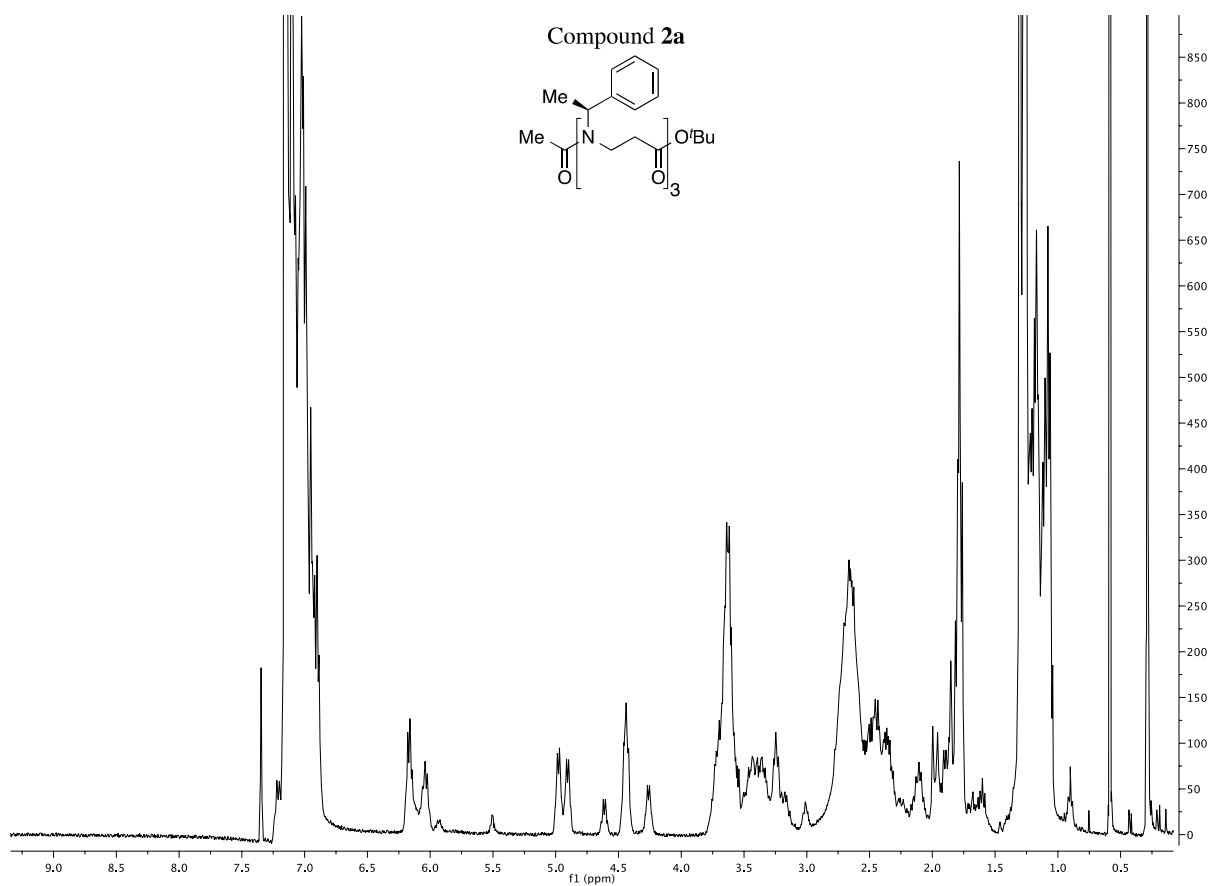

**Supplementary Figure 26** |  $^1\text{H}$  NMR spectrum of compound 2a. The spectrum was recorded in benzene- $d_6$  at room temperature.

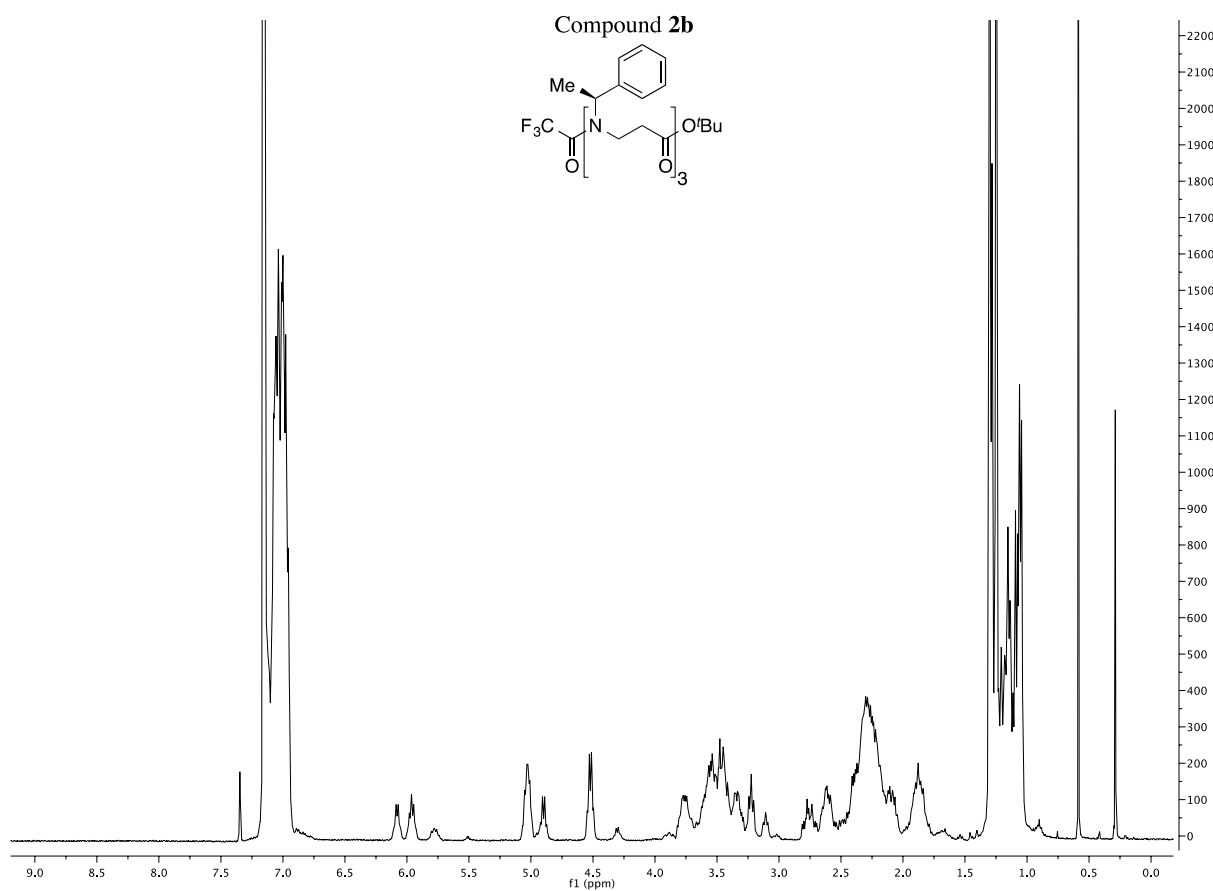

**Supplementary Figure 27** |  $^1\text{H}$  NMR spectrum of compound 2b. The spectrum was recorded in benzene- $d_6$  at room temperature.

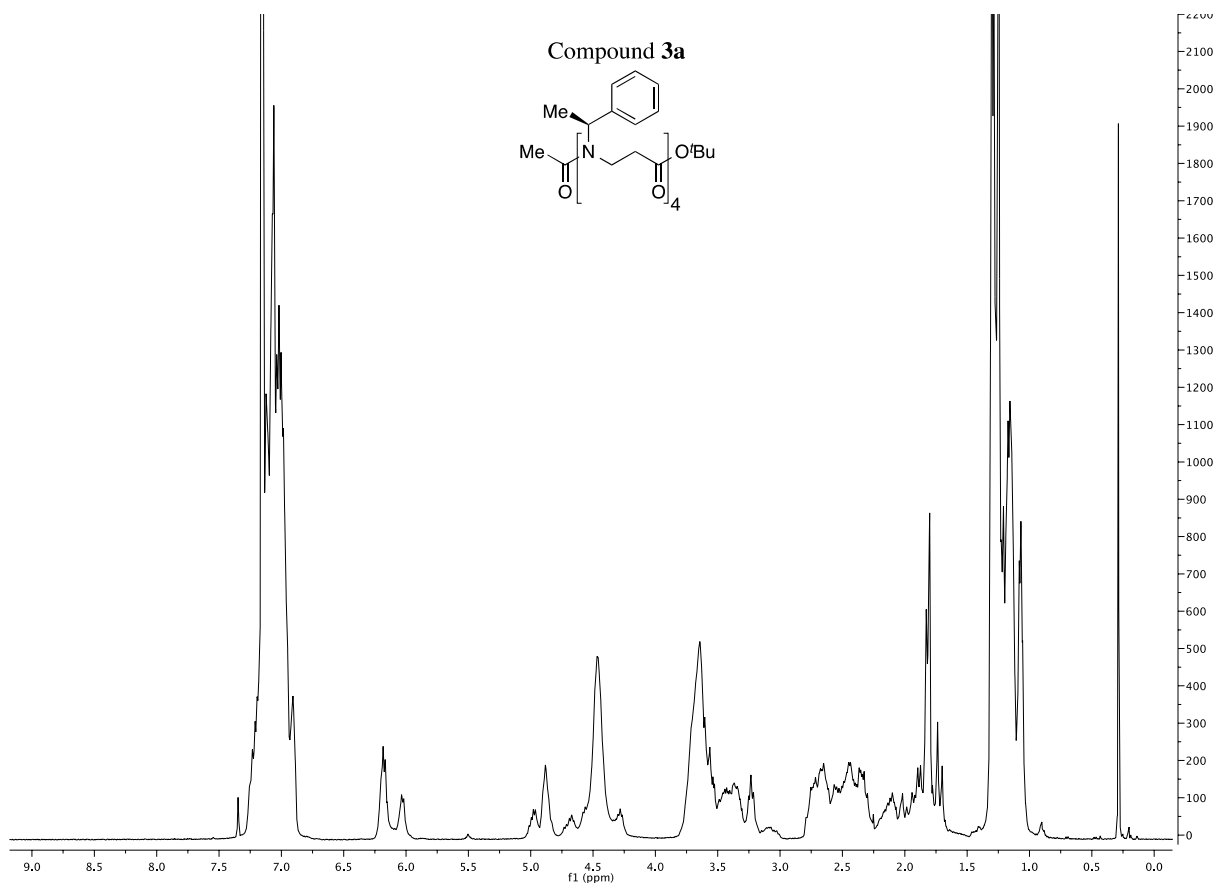

**Supplementary Figure 28 |  $^1\text{H}$  NMR spectrum of compound 3a.** The spectrum was recorded in benzene- $d_6$  at room temperature.

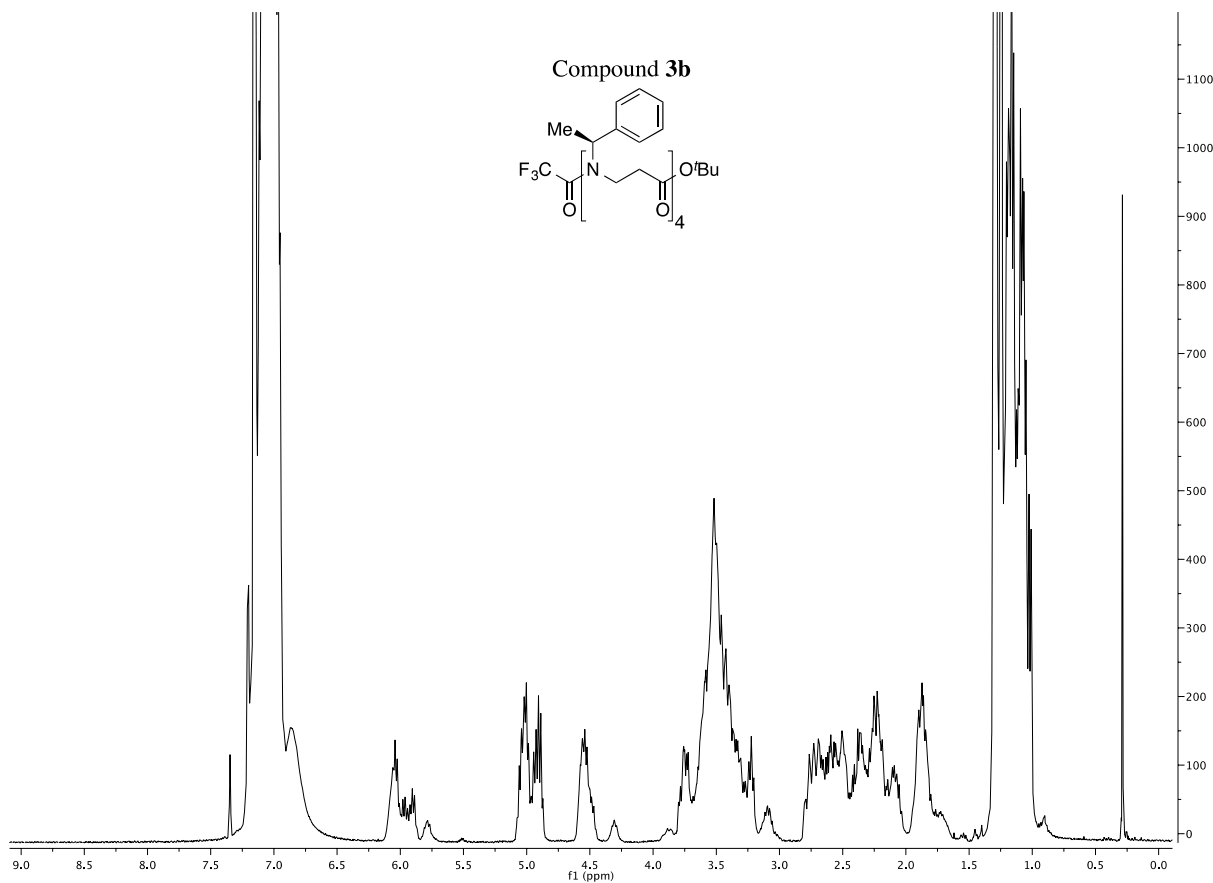

**Supplementary Figure 29 |  $^1\text{H}$  NMR spectrum of compound 3b.** The spectrum was recorded in benzene- $d_6$  at room temperature.

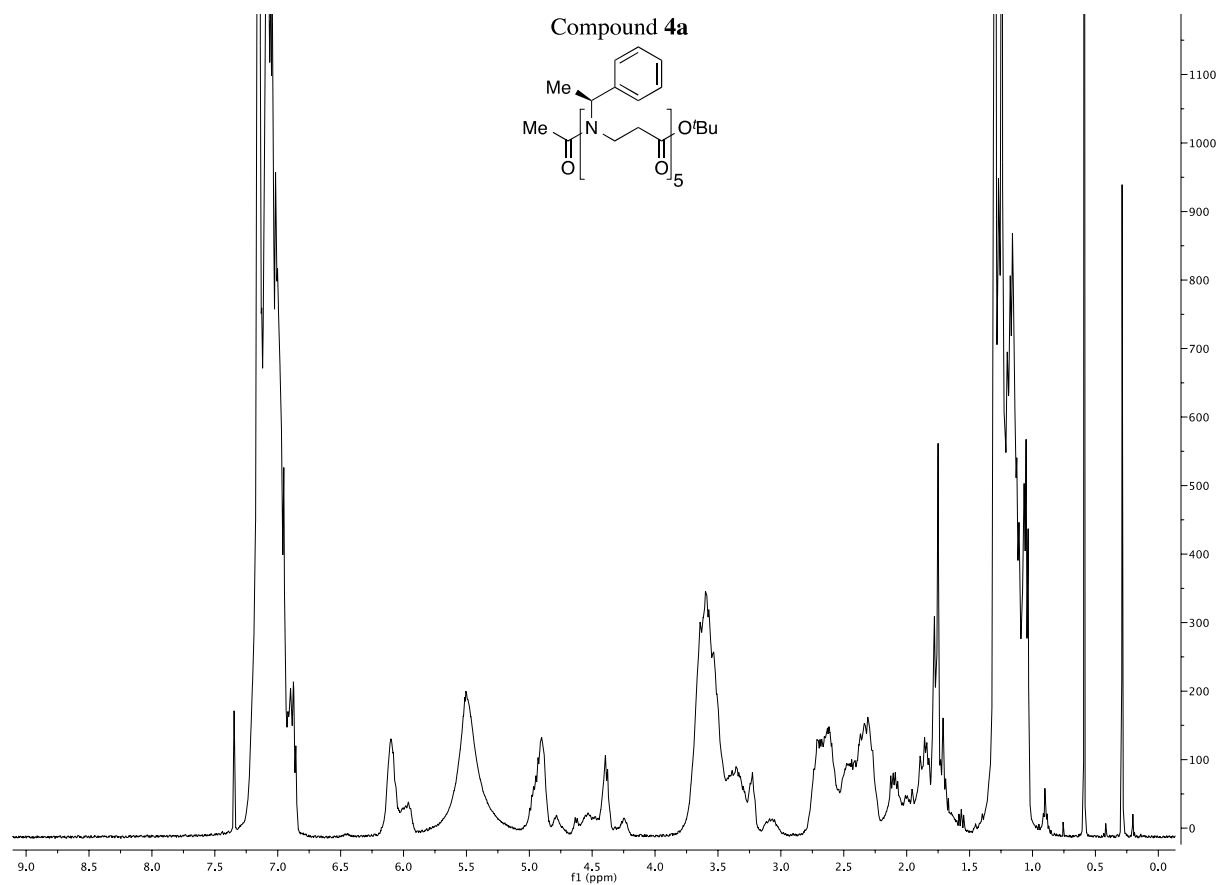

**Supplementary Figure 30** |  $^1\text{H}$  NMR spectrum of compound 4a. The spectrum was recorded in benzene- $d_6$  at room temperature.

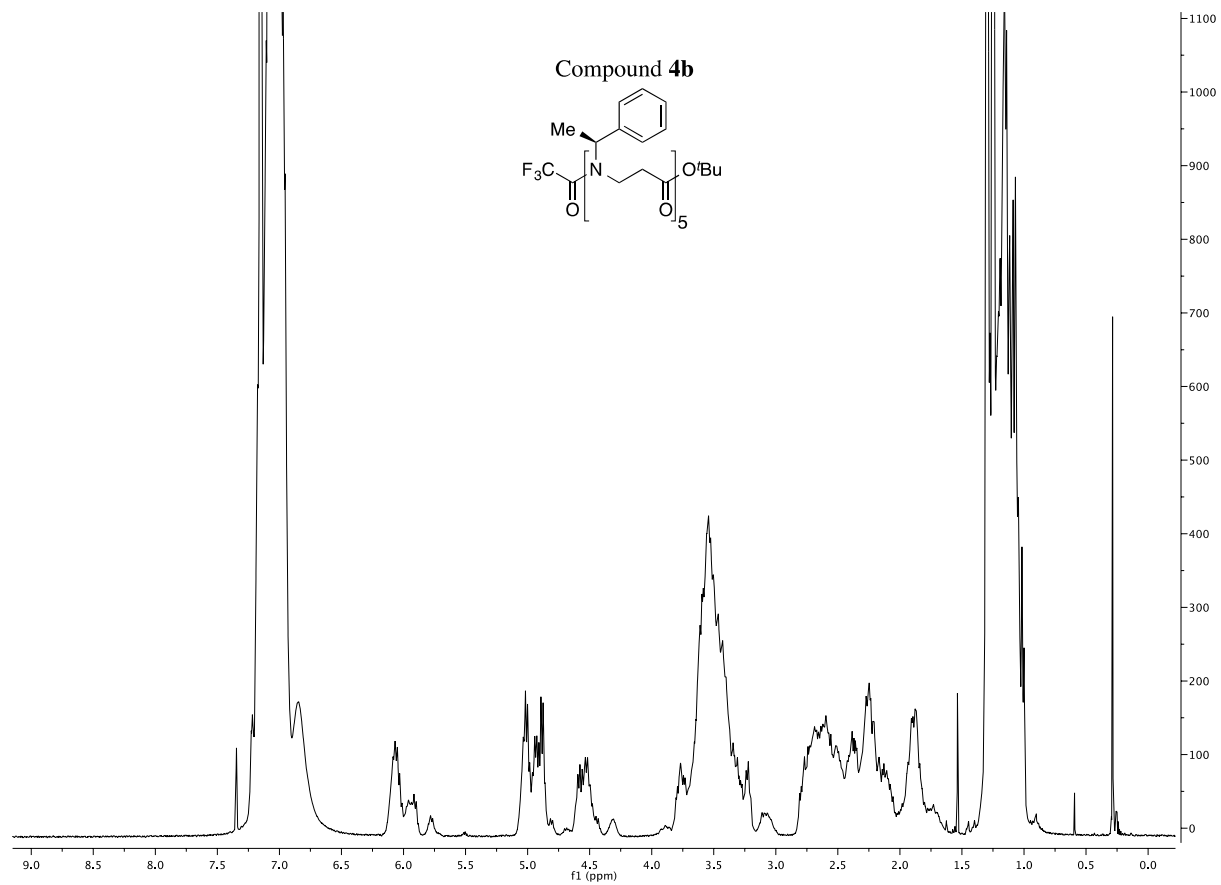

**Supplementary Figure 31** |  $^1\text{H}$  NMR spectrum of compound 4b. The spectrum was recorded in benzene- $d_6$  at room temperature.

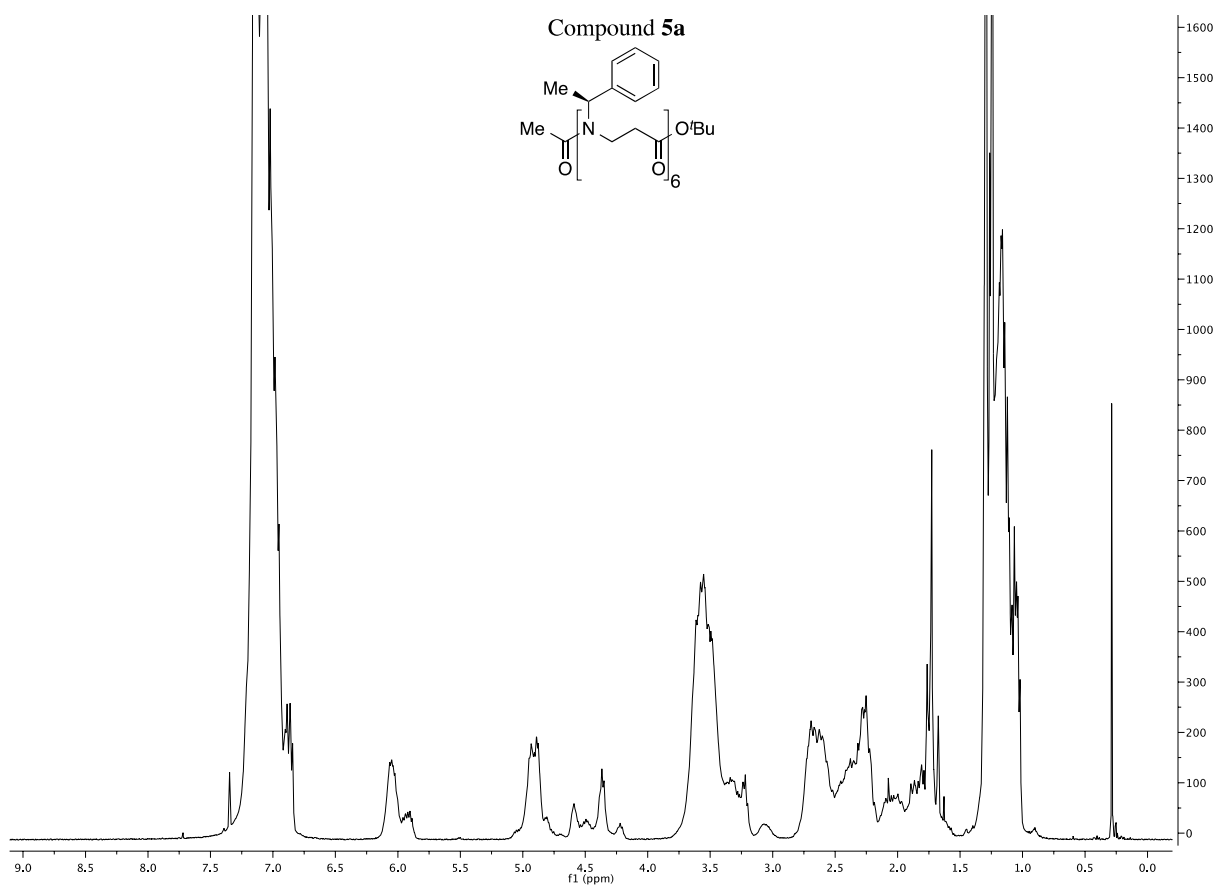

**Supplementary Figure 32** |  $^1\text{H}$  NMR spectrum of compound 5a. The spectrum was recorded in benzene- $d_6$  at room temperature

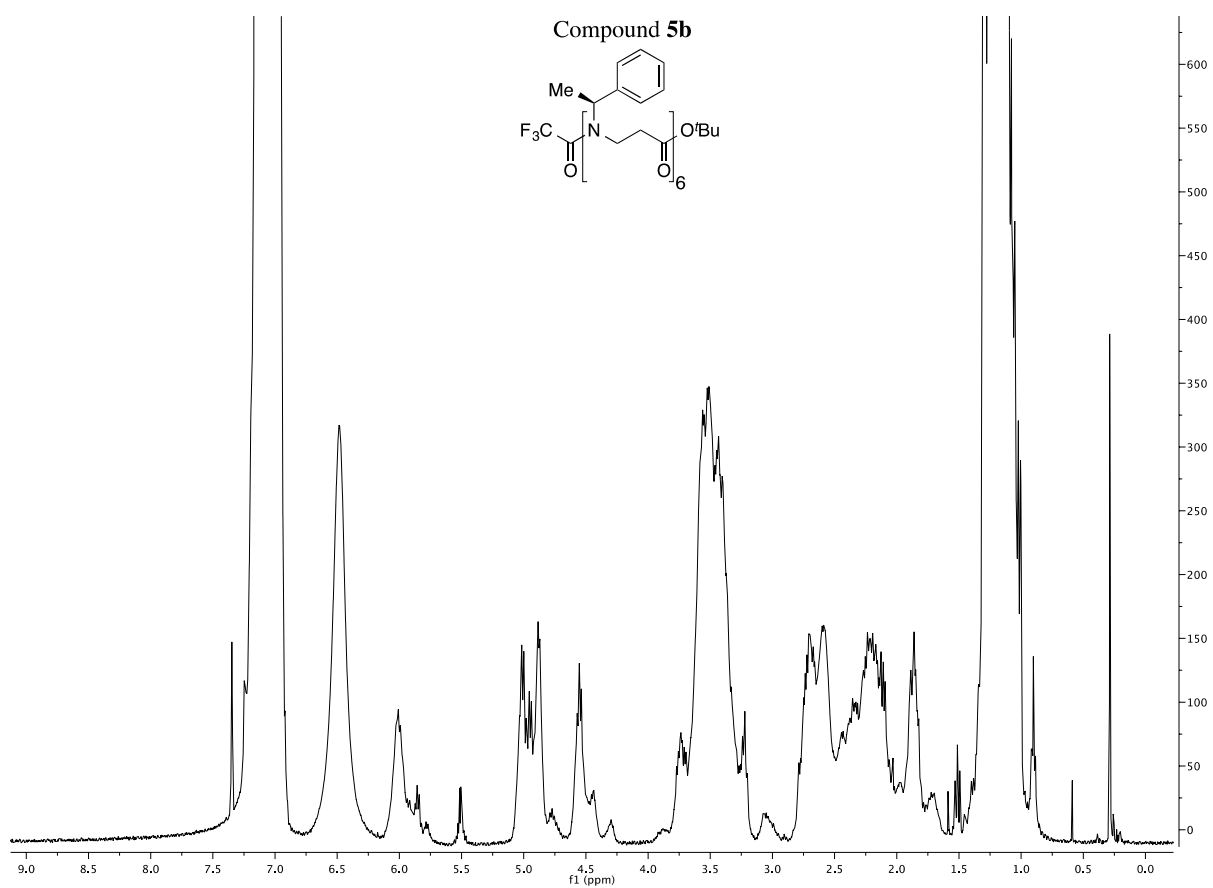

**Supplementary Figure 33** |  $^1\text{H}$  NMR spectrum of compound 5b. The spectrum was recorded in benzene- $d_6$  at room temperature.

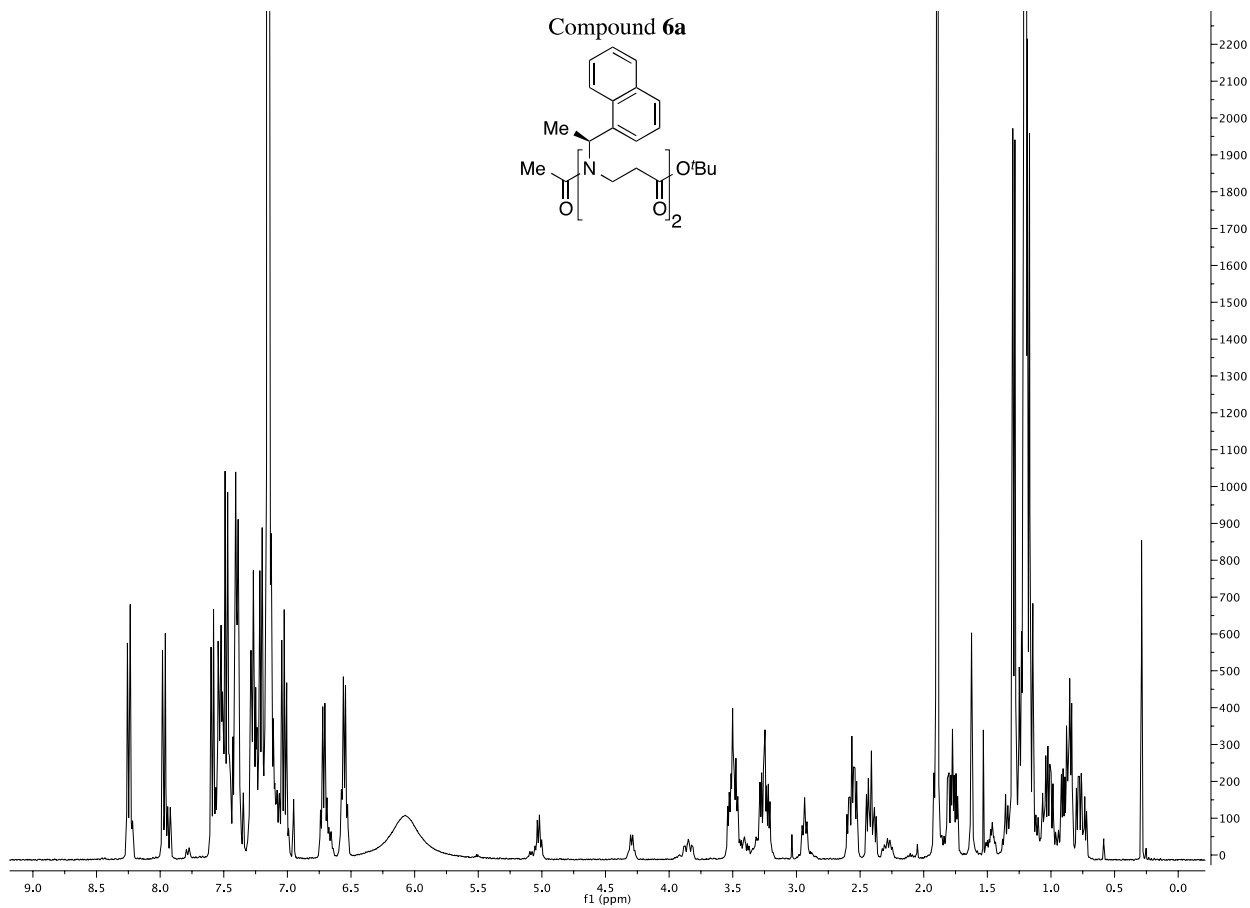

**Supplementary Figure 34** |  $^1\text{H}$  NMR spectrum of compound **6a**. The spectrum was recorded in benzene- $d_6$  at room temperature.

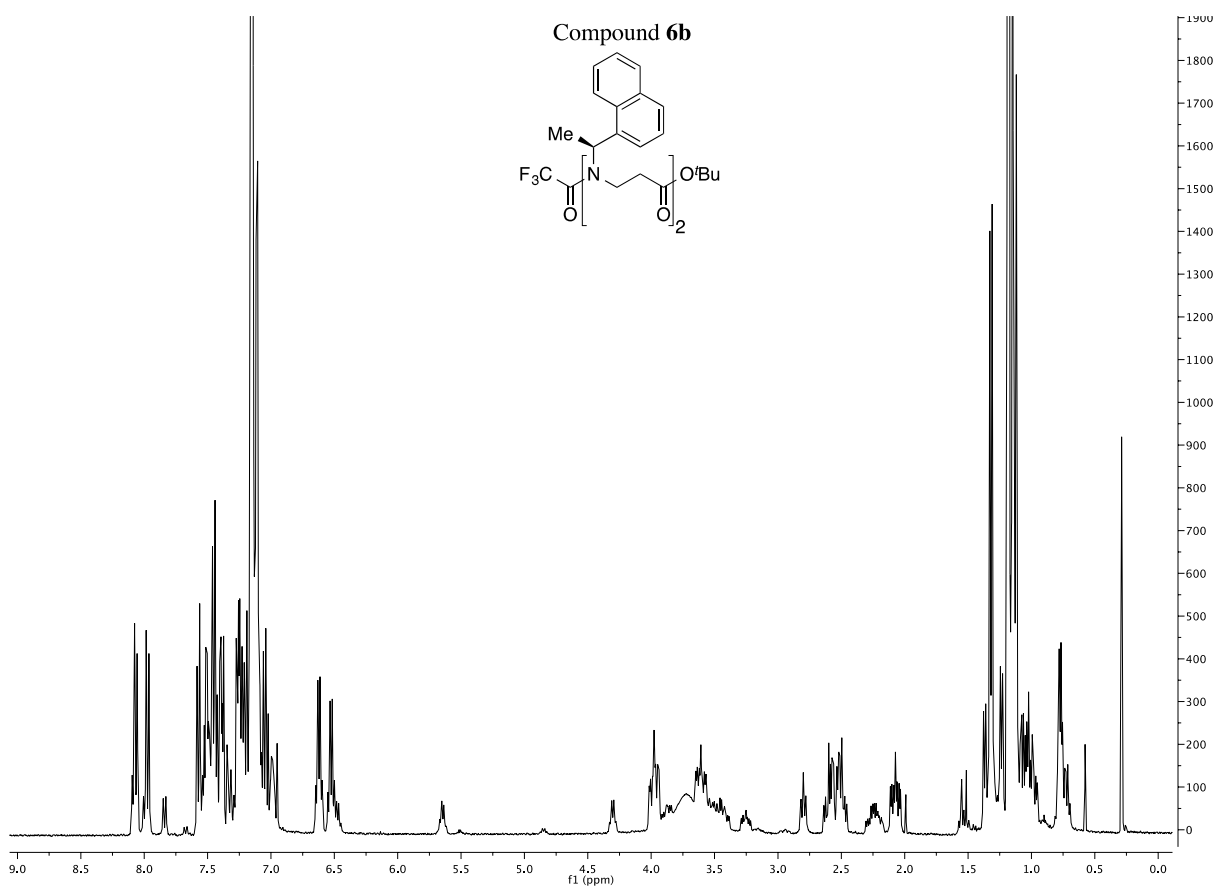

**Supplementary Figure 35** |  $^1\text{H}$  NMR spectrum of compound **6b**. The spectrum was recorded in benzene- $d_6$  at room temperature.

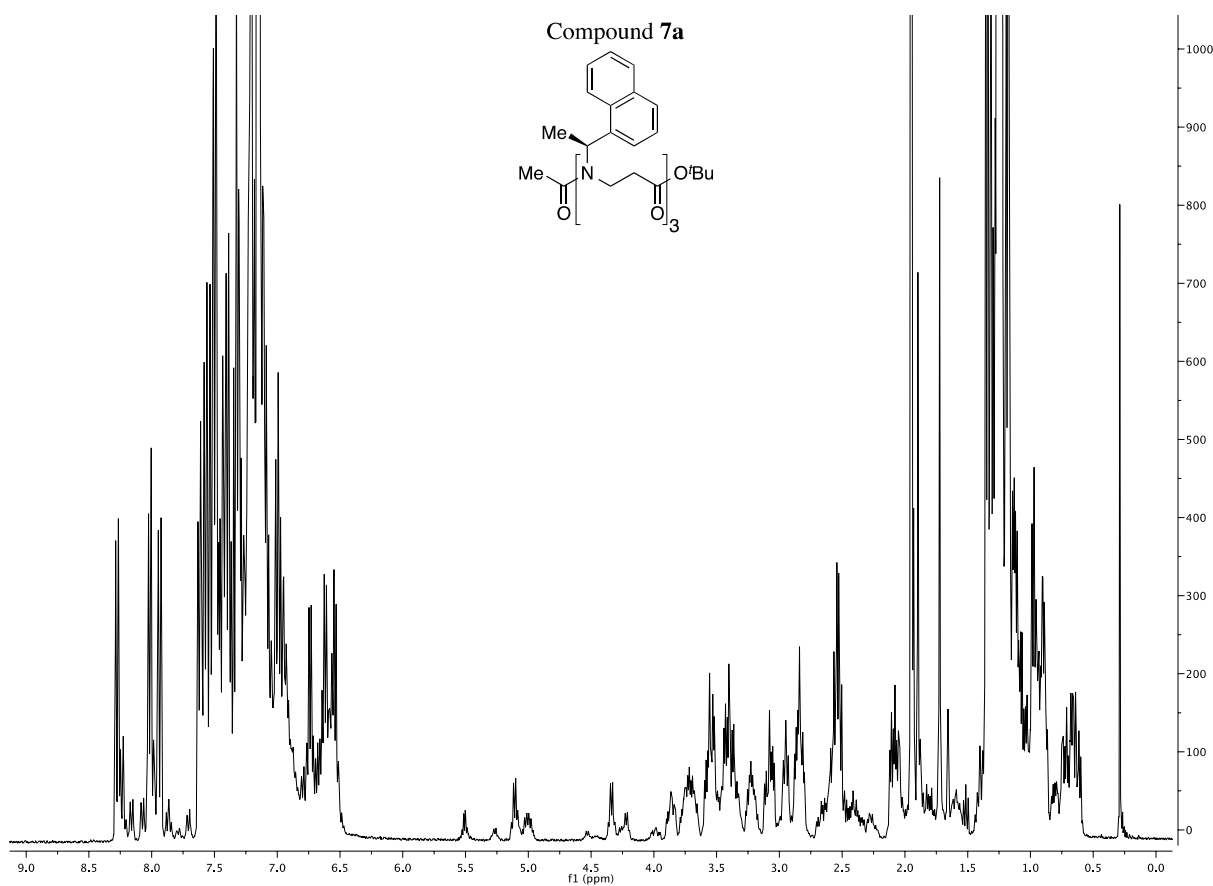

**Supplementary Figure 36** |  $^1\text{H}$  NMR spectrum of compound **7a**. The spectrum was recorded in benzene- $d_6$  at room temperature.

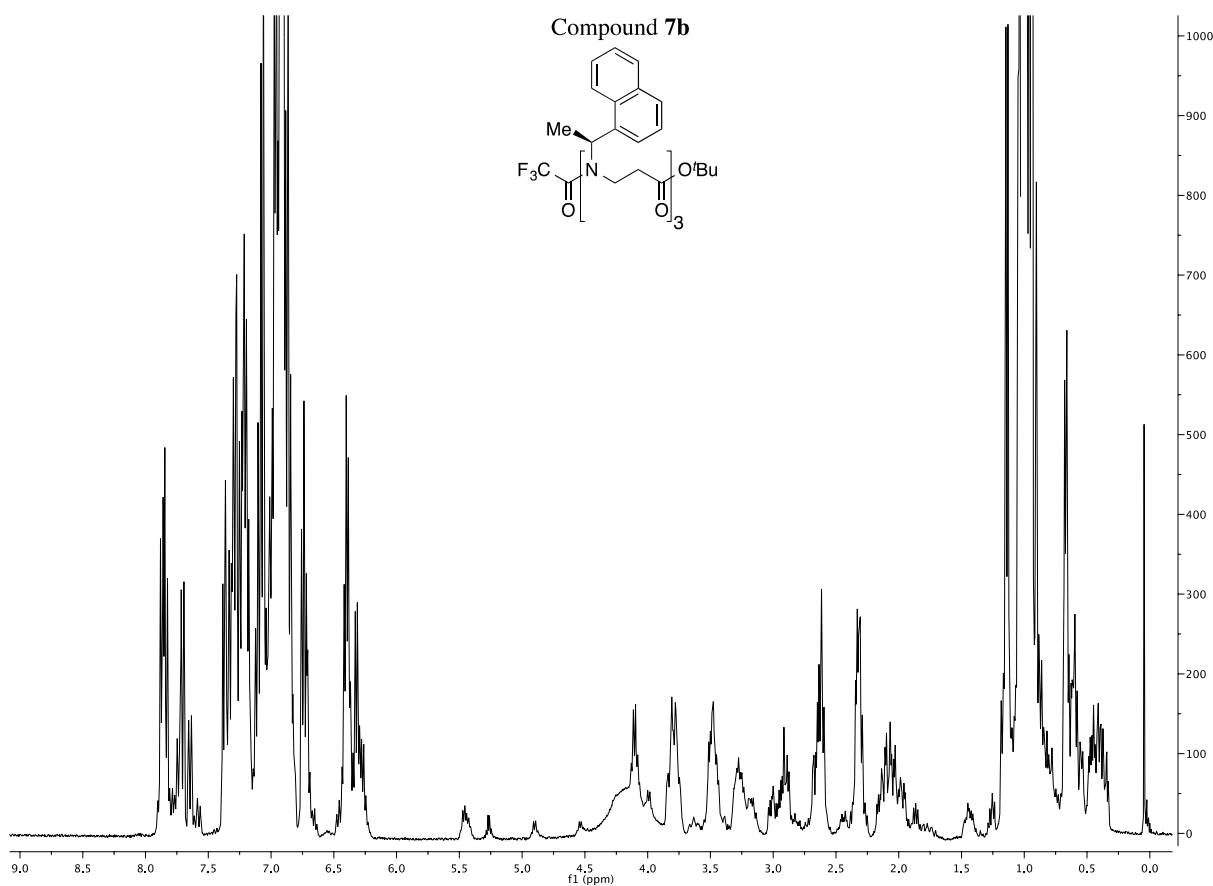

**Supplementary Figure 37** |  $^1\text{H}$  NMR spectrum of compound **7b**. The spectrum was recorded in benzene- $d_6$  at room temperature.

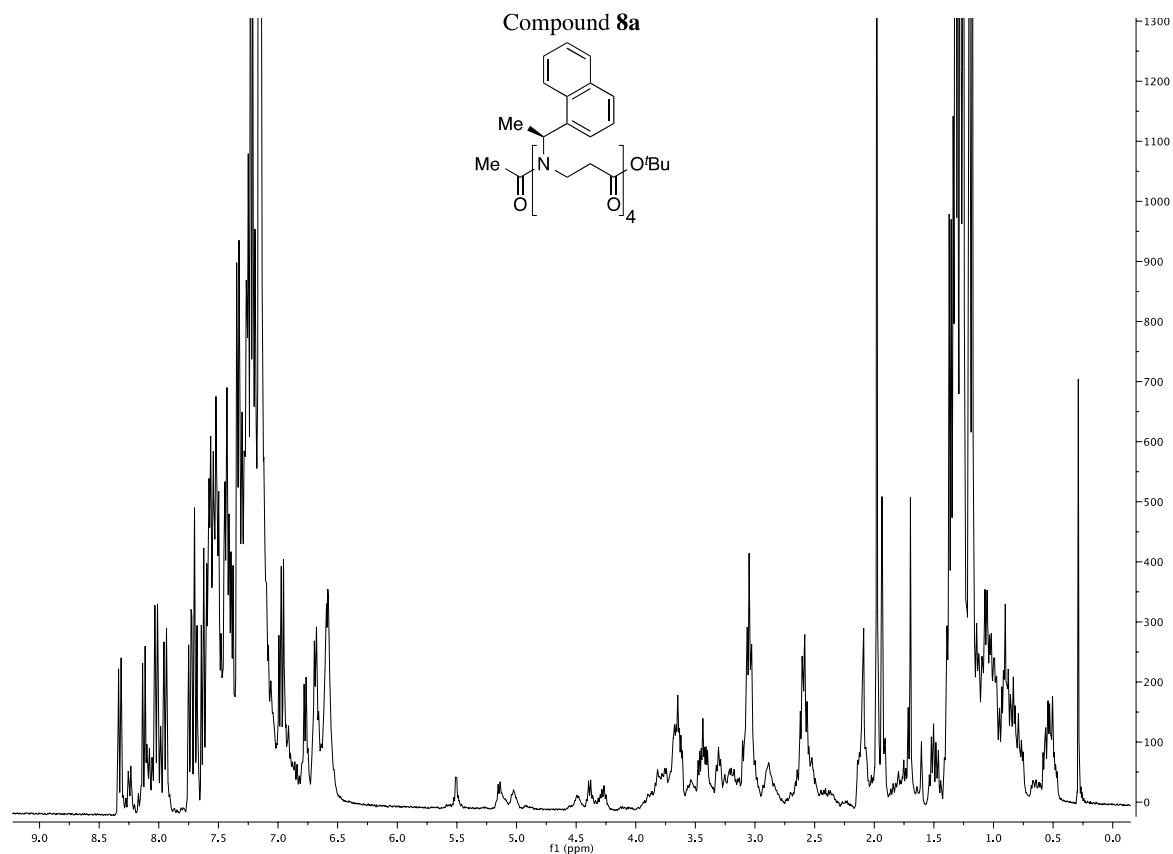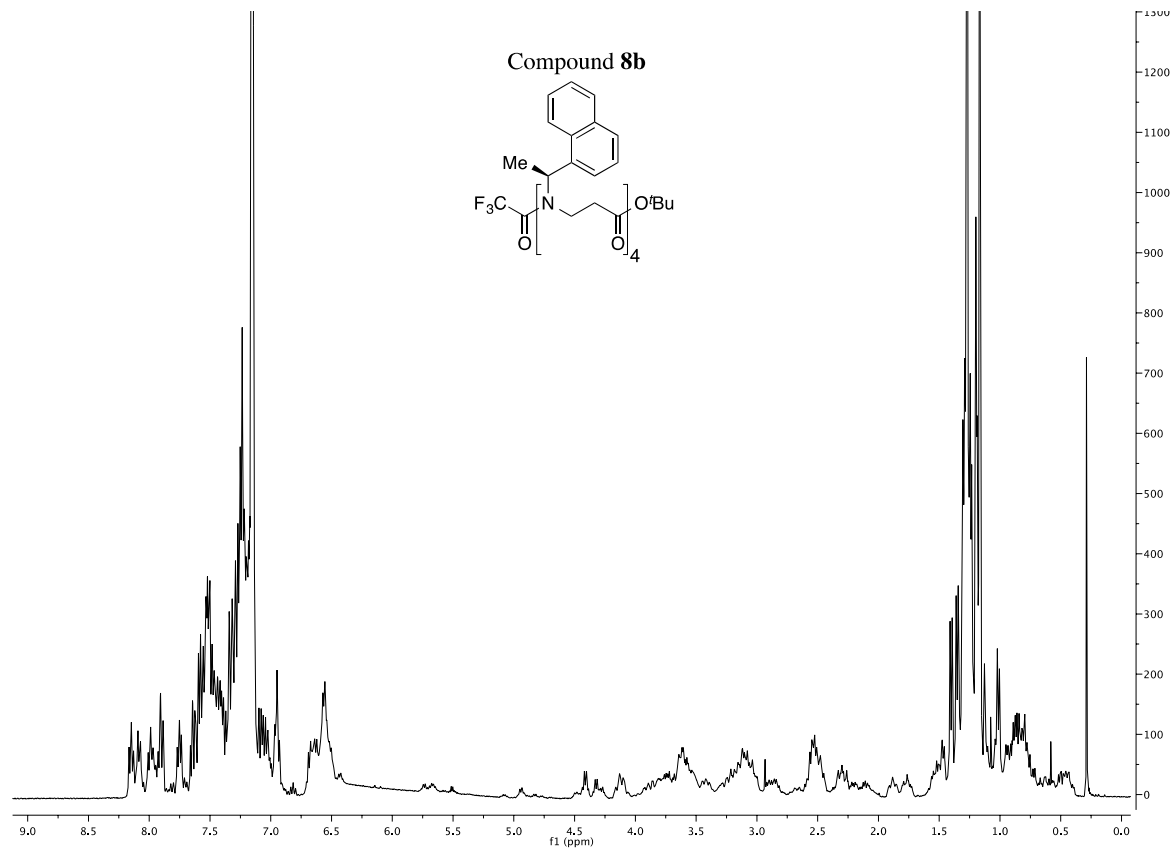

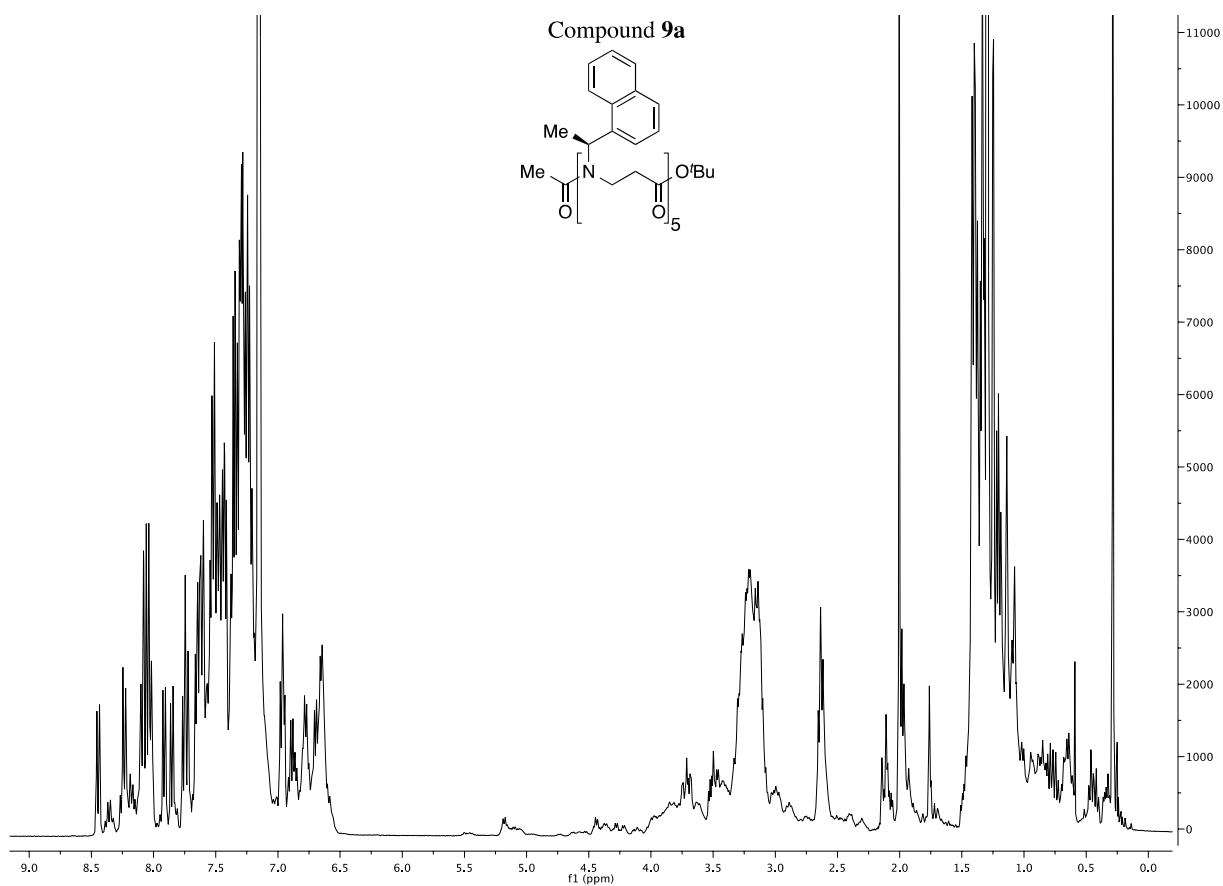

**Supplementary Figure 40** |  $^1\text{H}$  NMR spectrum of compound 9a. The spectrum was recorded in benzene- $d_6$  at room temperature.

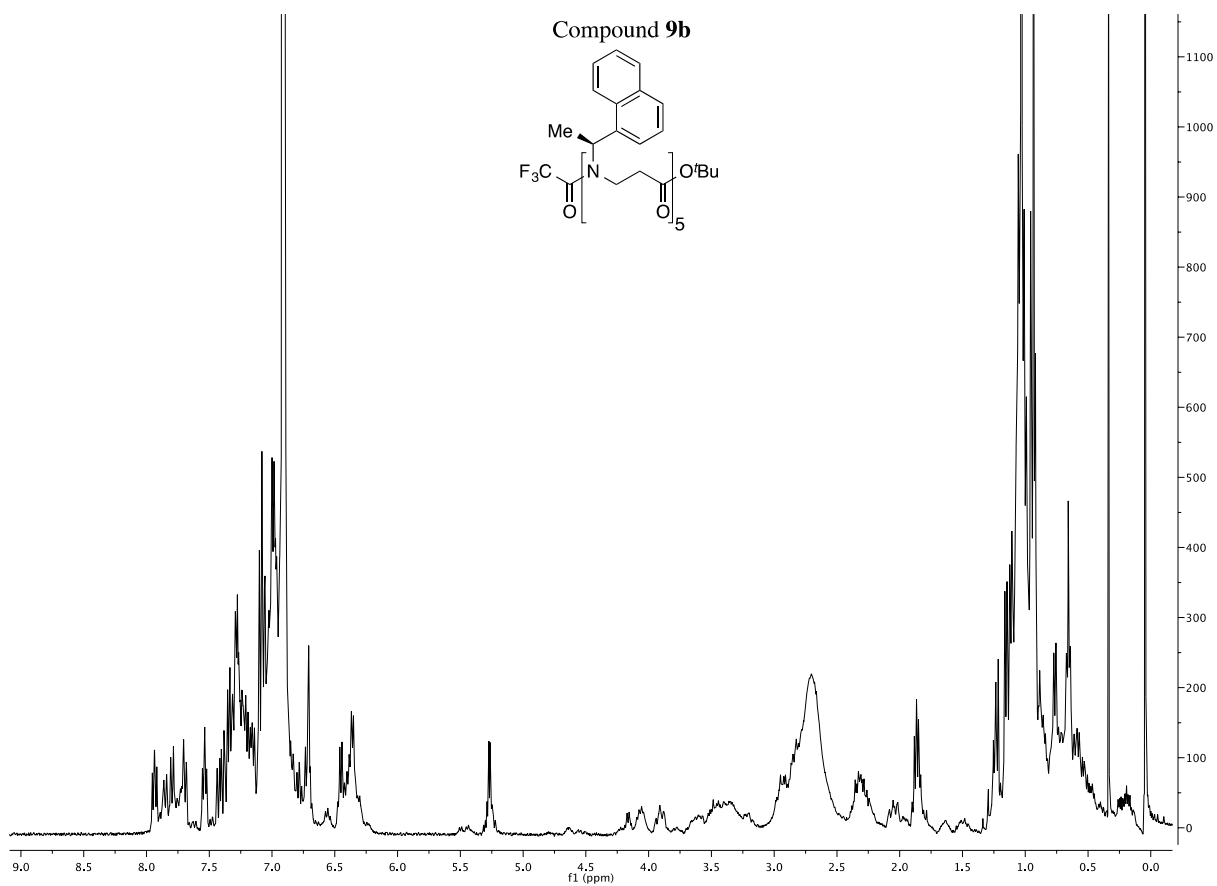

**Supplementary Figure 41** |  $^1\text{H}$  NMR spectrum of compound 9b. The spectrum was recorded in benzene- $d_6$  at room temperature.



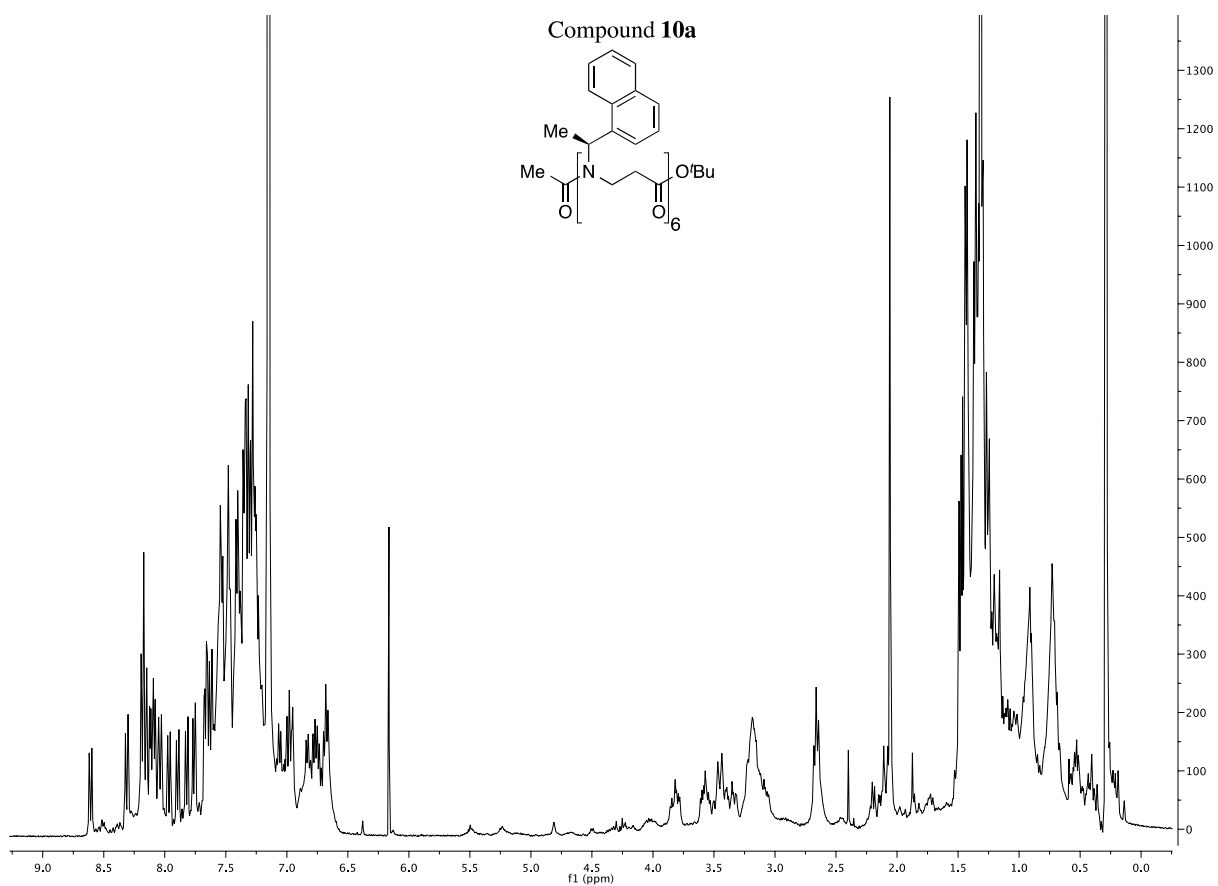

**Supplementary Figure 42** |  $^1\text{H}$  NMR spectrum of compound 10a. The spectrum was recorded in benzene- $d_6$  at room temperature.

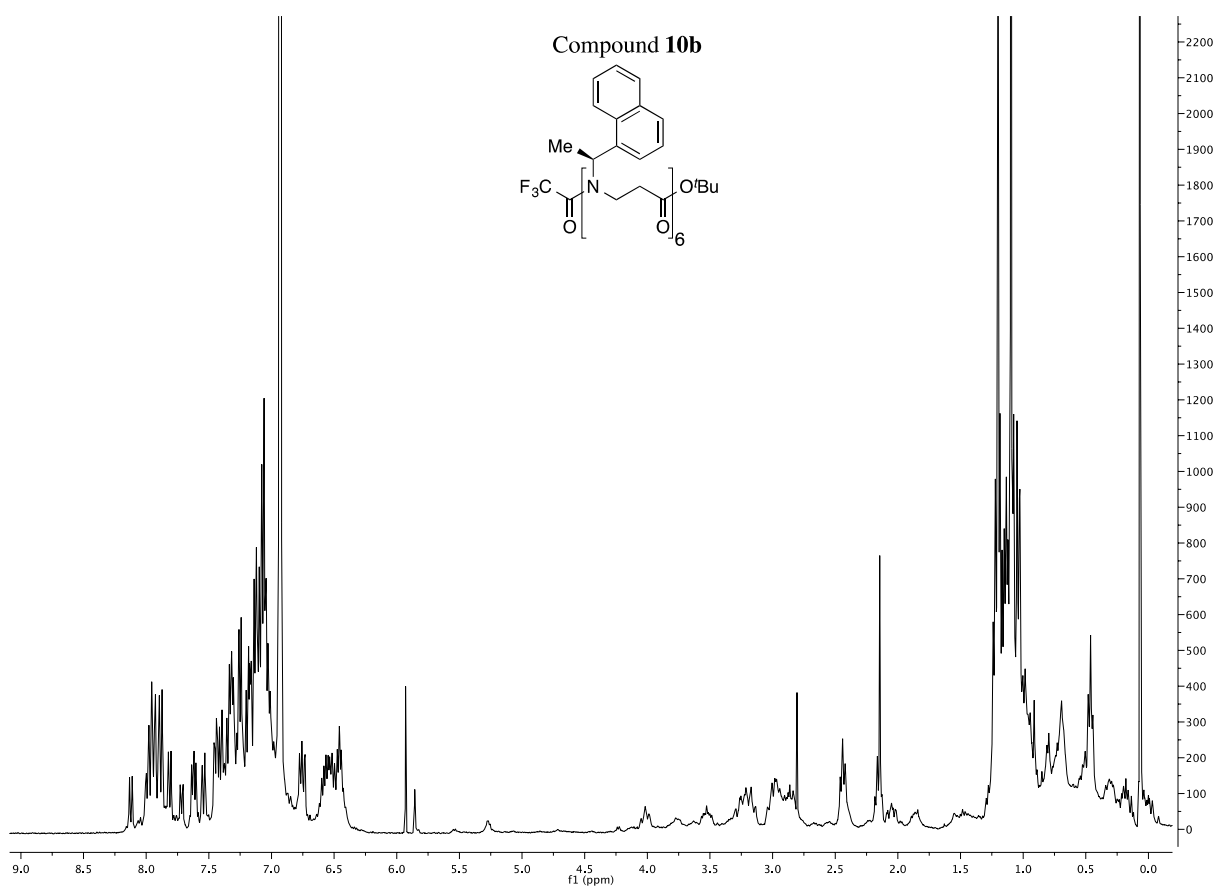

**Supplementary Figure 43** |  $^1\text{H}$  NMR spectrum of compound 10b. The spectrum was recorded in benzene- $d_6$  at room temperature.

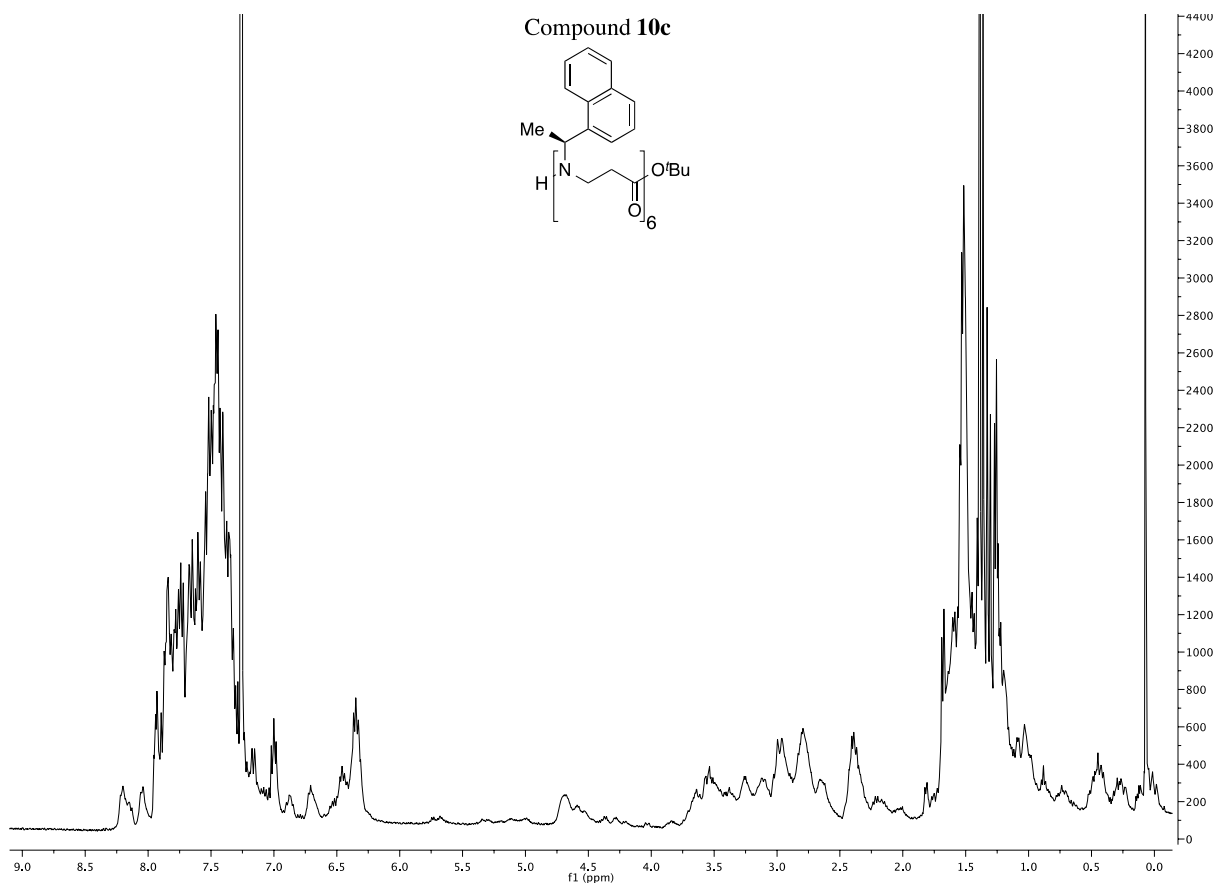

**Supplementary Figure 44** |  $^1\text{H}$  NMR spectrum of compound **10c**. The spectrum was recorded in chloroform- $d_3$  at room temperature.

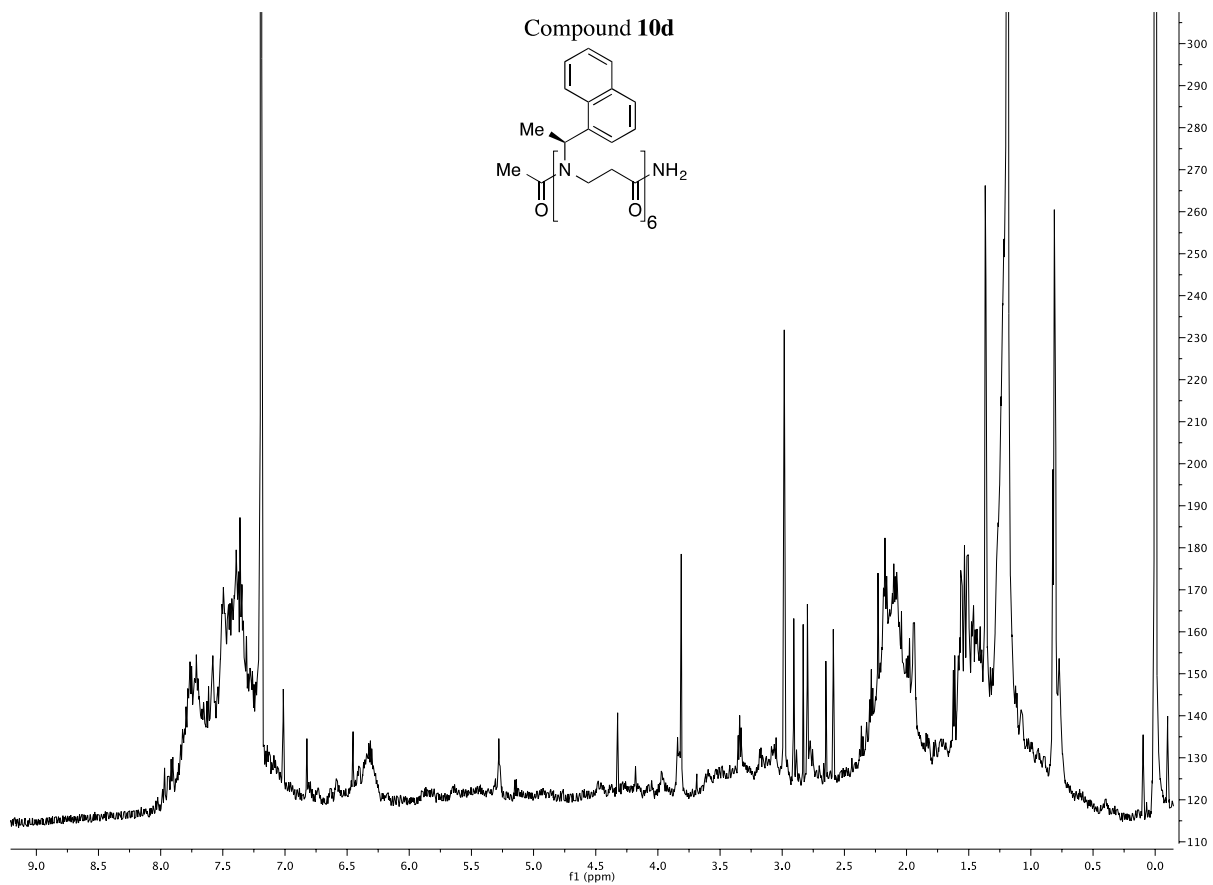

**Supplementary Figure 45** |  $^1\text{H}$  NMR spectrum of compound **10d**. The spectrum was recorded in chloroform- $d_3$  at room temperature.

Compound 10e

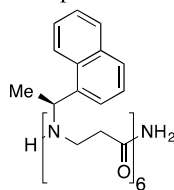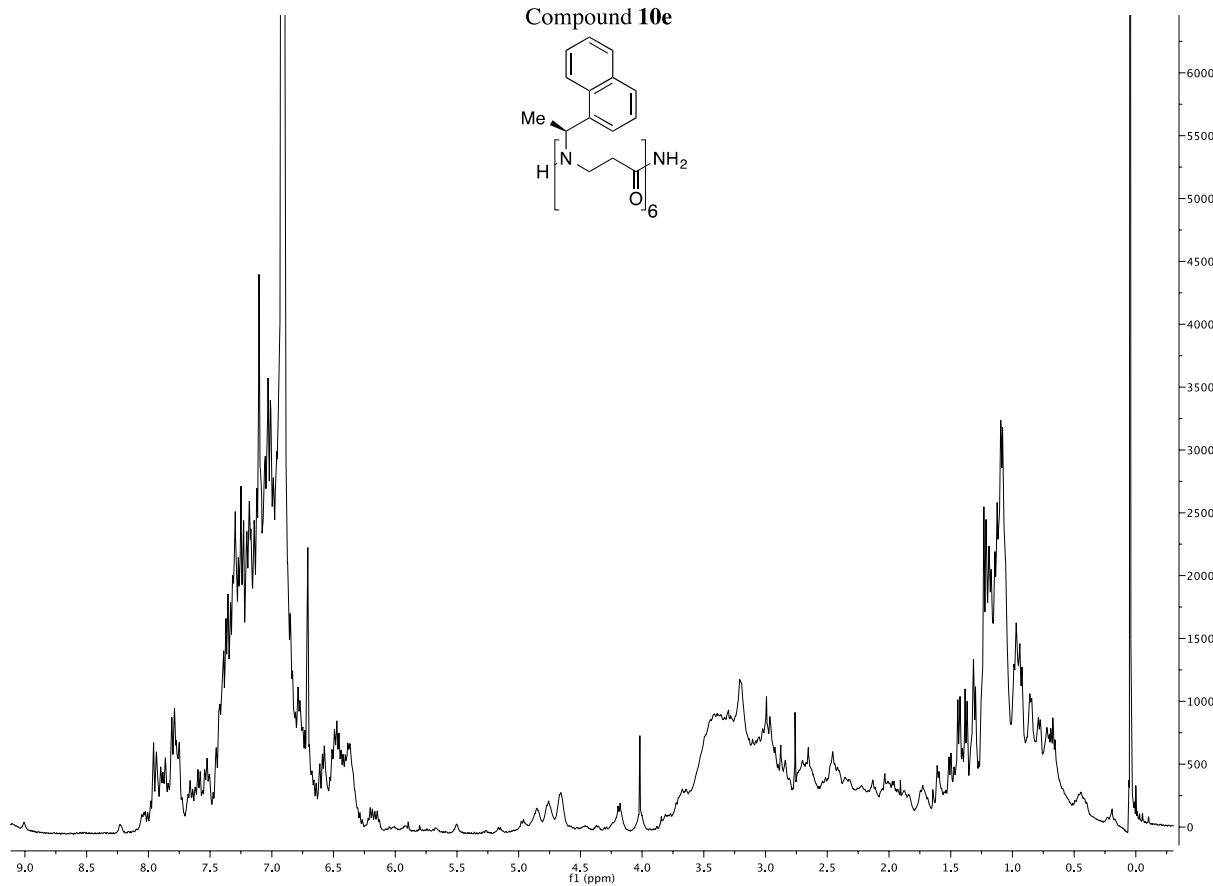

Supplementary Figure 46 | <sup>1</sup>H NMR spectrum of compound 10e. The spectrum was recorded in benzene-*d*<sub>6</sub> at room temperature.

Compound 11

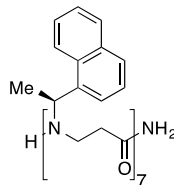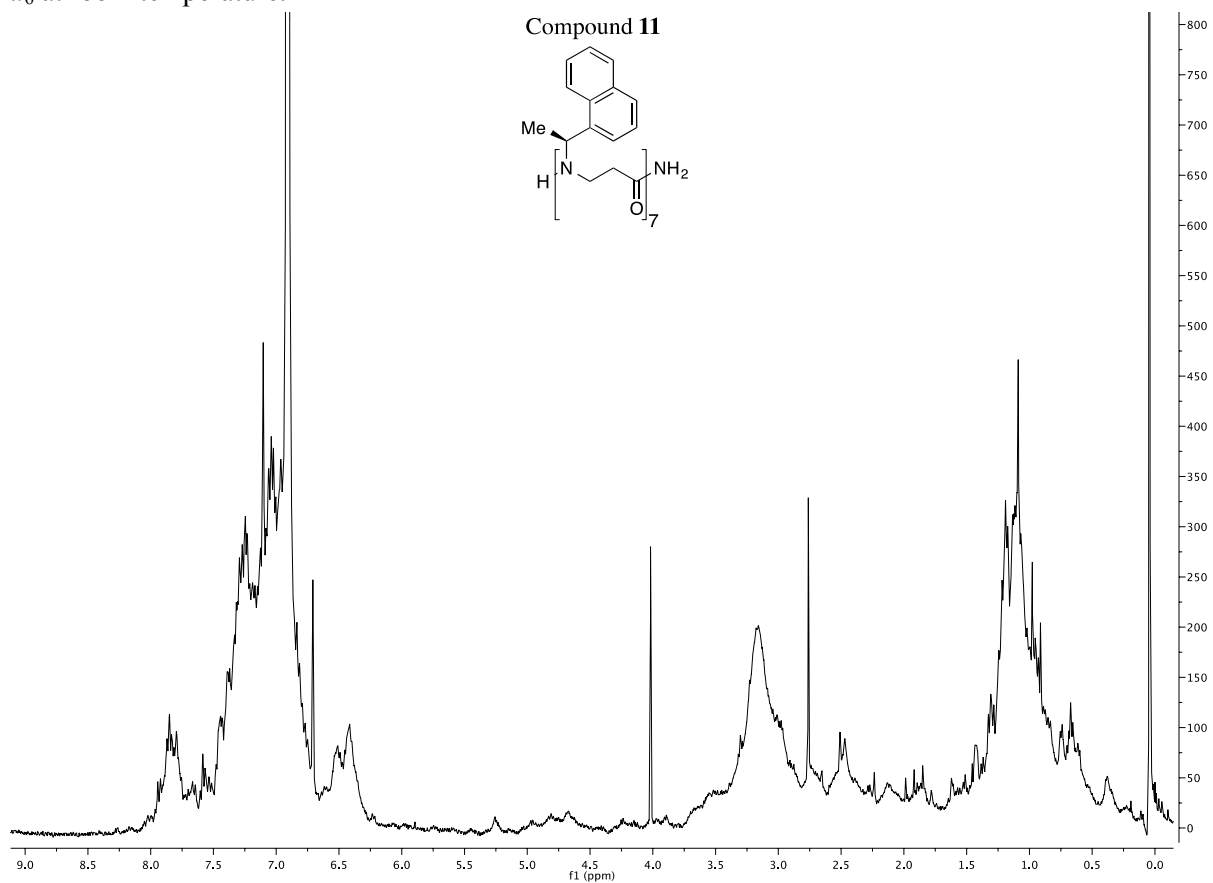

Supplementary Figure 47 | <sup>1</sup>H NMR spectrum of compound 11. The spectrum was recorded in benzene-*d*<sub>6</sub> at room temperature.

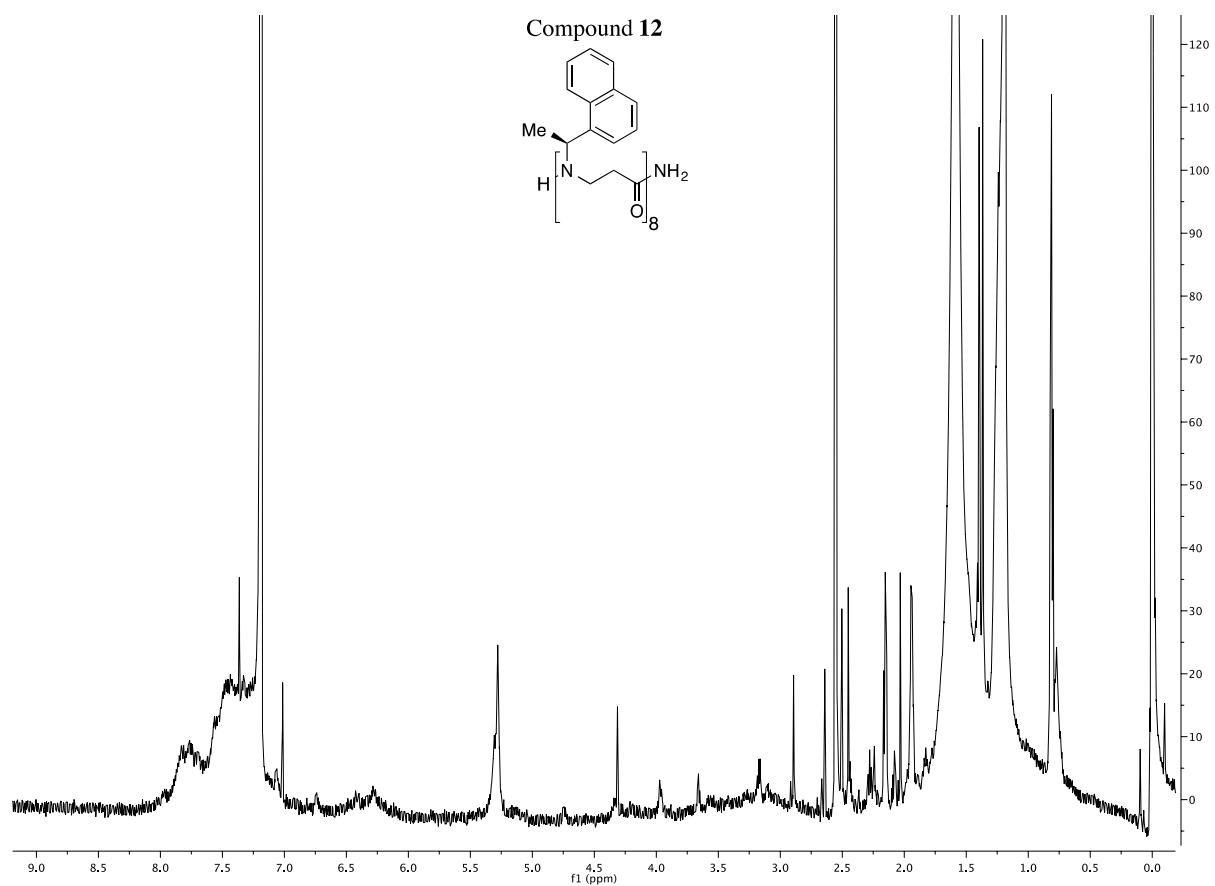

**Supplementary Figure 48** |  $^1\text{H}$  NMR spectrum of compound 12. The spectrum was recorded in chloroform- $d_3$  at room temperature.

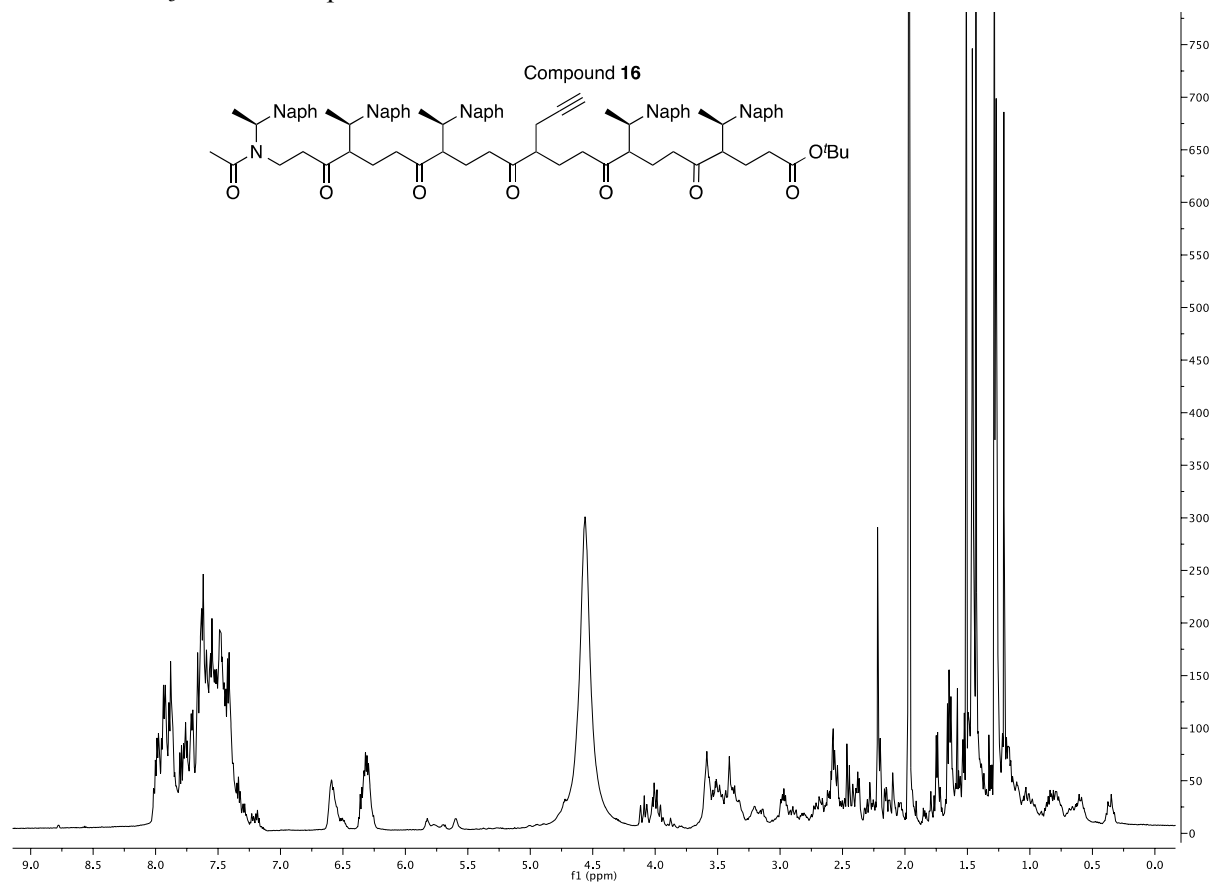

**Supplementary Figure 49** |  $^1\text{H}$  NMR spectrum of compound 16. The spectrum was recorded in acetonitrile- $d_3$  at room temperature.

## Supplementary Tables

Supplementary Table 1 | Torsion angles for additional residues

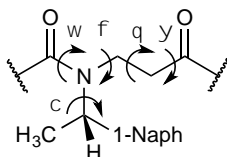

| Compound 10a                                                             |        |          |        |          |          |          |
|--------------------------------------------------------------------------|--------|----------|--------|----------|----------|----------|
| 2                                                                        | $\phi$ | $\theta$ | $\psi$ | $\omega$ | $\chi_1$ | $\chi_2$ |
|                                                                          | 96.2   | 172.5    | -175.3 | -13.7    | 53.6     | -80.5    |
| Compound 10c                                                             |        |          |        |          |          |          |
| Residue                                                                  | $\phi$ | $\phi$   | $\psi$ | $\omega$ | $\chi_1$ | $\chi_2$ |
| 3                                                                        | 96.9   | 166.4    | -179.9 | -19.4    | 66.7     | -61.5    |
| 4                                                                        | 94.3   | 168      | -178.8 | -9.5     | 54.4     | -74.2    |
| 5                                                                        | 97.4   | 166      | -173.9 | -13.4    | 56.3     | -73.8    |
| From DFT calculations previously published (Hofmann et al.) <sup>2</sup> |        |          |        |          |          |          |
|                                                                          | 95.8   | -179.6   | -178.2 | 8.6      | n.a.     | n.a.     |

Supplementary Table 2 | Examples of naphthyl-backbone interactions<sup>a</sup>

| Compound 10a | Distance (Å) | Compound 10c | Distance (Å) |
|--------------|--------------|--------------|--------------|
| C1–C6        | 3.31(2)      | C22–C62      | 3.35(2)      |
| C3–C15       | □□□□□□□□     | C14–C152     | 3.40(2)      |
| O1–C15       | 3.54(1)      | C152–O14     | 3.53(2)      |

<sup>a</sup>Shown in green in Supplementary Fig. 9.

**Supplementary Table 3 | Characterization data for compounds 1a–10c**

| Comp. | Formula                                                                      | Yield <sup>a</sup><br>[%] | MS: <i>m/z</i> for [M+H] <sup>+</sup><br>[calcd./obs.] | HRMS: <i>m/z</i> for [M+H] <sup>+</sup><br>[calcd./obs. ( $\Delta M$ )] | HPLC<br>[ <i>t<sub>R</sub></i> /min] | HPLC<br>[% Purity] <sup>b</sup> |
|-------|------------------------------------------------------------------------------|---------------------------|--------------------------------------------------------|-------------------------------------------------------------------------|--------------------------------------|---------------------------------|
| 1a    | C <sub>28</sub> H <sub>38</sub> N <sub>2</sub> O <sub>4</sub>                | 21 (21)                   | 467.3/467.3                                            | 467.2904/467.2920 (3.4)                                                 | 12.50                                | 96                              |
| 1b    | C <sub>28</sub> H <sub>35</sub> N <sub>2</sub> O <sub>4</sub>                | 30 (30)                   | 521.3/521.2                                            | 521.2622/521.2630 (1.6)                                                 | 14.11                                | 95                              |
| 2a    | C <sub>39</sub> H <sub>51</sub> N <sub>3</sub> O <sub>5</sub>                | 35 (36)                   | 642.4/642.5                                            | 642.3901/642.3901 (0.0)                                                 | 13.32                                | 95                              |
| 2b    | C <sub>39</sub> H <sub>48</sub> F <sub>3</sub> N <sub>3</sub> O <sub>5</sub> | 25 (16)                   | 696.4/696.4                                            | 696.3619/696.3625 (0.9)                                                 | 15.10                                | 98                              |
| 3a    | C <sub>50</sub> H <sub>64</sub> N <sub>4</sub> O <sub>6</sub>                | 34 (16)                   | 817.5/817.5                                            | 839.4718/839.4737 <sup>c</sup> (2.3)                                    | 14.24                                | 93                              |
| 3b    | C <sub>50</sub> H <sub>61</sub> F <sub>3</sub> N <sub>4</sub> O <sub>6</sub> | 45 (21)                   | 871.5/871.5                                            | 871.4616/871.4658 (4.8)                                                 | 16.06                                | 95                              |
| 4a    | C <sub>61</sub> H <sub>77</sub> N <sub>5</sub> O <sub>7</sub>                | 22 (7)                    | 992.6/992.8                                            | 992.5896/992.5935 (4.0)                                                 | 15.00                                | 97                              |
| 4b    | C <sub>61</sub> H <sub>74</sub> F <sub>3</sub> N <sub>5</sub> O <sub>7</sub> | 34 (11)                   | 1046.6/1046.7                                          | 1046.5613/1046.5646 (3.1)                                               | 16.83                                | 95                              |
| 5a    | C <sub>72</sub> H <sub>90</sub> N <sub>6</sub> O <sub>8</sub>                | 44 (10)                   | 1167.9/1167.8                                          | 1189.6712/1189.6737 <sup>c</sup> (2.1)                                  | 16.23                                | 98                              |
| 5b    | C <sub>72</sub> H <sub>87</sub> F <sub>3</sub> N <sub>6</sub> O <sub>8</sub> | 43 (9)                    | 1221.7/1221.7                                          | 1243.6430/1243.6429 <sup>c</sup> (0.1)                                  | 18.42                                | 97                              |
| 6a    | C <sub>36</sub> H <sub>42</sub> N <sub>2</sub> O <sub>4</sub>                | 38 (33)                   | 567.3/567.4                                            | 567.3218/567.3242 (4.3)                                                 | 14.05                                | 96                              |
| 6b    | C <sub>36</sub> H <sub>39</sub> F <sub>3</sub> N <sub>2</sub> O <sub>4</sub> | 36 (32)                   | 621.3/621.2                                            | 621.2935/621.2959 (3.8)                                                 | 16.14                                | 99                              |
| 7a    | C <sub>51</sub> H <sub>57</sub> N <sub>3</sub> O <sub>5</sub>                | 39 (12)                   | 792.4/792.4                                            | 792.4371/792.4396 (3.1)                                                 | 18.40                                | 95                              |
| 7b    | C <sub>51</sub> H <sub>54</sub> F <sub>3</sub> N <sub>3</sub> O <sub>5</sub> | 16 (11)                   | 846.4/846.3                                            | 846.4089/846.4114 (3.3)                                                 | 19.41                                | 98                              |
| 8a    | C <sub>66</sub> H <sub>72</sub> N <sub>4</sub> O <sub>6</sub>                | 30 (18)                   | 1017.6/1017.5                                          | 1017.5526/1017.5566 (3.9)                                               | 20.34                                | 99                              |
| 8b    | C <sub>66</sub> H <sub>69</sub> F <sub>3</sub> N <sub>4</sub> O <sub>6</sub> | 32 (19)                   | 1071.5/1071.5                                          | 1071.5242/1071.5287 (4.2)                                               | 23.17                                | 97                              |
| 9a    | C <sub>81</sub> H <sub>87</sub> N <sub>5</sub> O <sub>7</sub>                | 34 (10)                   | 1242.7/1242.6                                          | 1264.6498/1264.6537 <sup>c</sup> (3.2)                                  | 24.31                                | 96                              |
| 9b    | C <sub>81</sub> H <sub>84</sub> F <sub>3</sub> N <sub>5</sub> O <sub>7</sub> | 6 (2)                     | 1296.6/1296.4                                          | 648.8234/648.8230 <sup>d</sup> (0.6)                                    | 22.14                                | 97                              |
| 10a   | C <sub>96</sub> H <sub>102</sub> N <sub>6</sub> O <sub>8</sub>               | 53 (14)                   | 1468.9/1468.7                                          | 734.8969/734.8985 <sup>d</sup> (2.1)                                    | 28.66                                | 96                              |
| 10b   | C <sub>96</sub> H <sub>99</sub> F <sub>3</sub> N <sub>6</sub> O <sub>8</sub> | 54 (15)                   | 1522.9/1522.4                                          | 761.8828/761.8832 <sup>d</sup> (0.5)                                    | 30.06                                | 95                              |
| 10c   | C <sub>94</sub> H <sub>100</sub> N <sub>6</sub> O <sub>7</sub>               | 60                        | 1426.7/1426.6                                          | 1432.7191/1432.7222 (2.2)                                               | 14.16                                | 92                              |

<sup>a</sup>Isolated yields for addition of one sub-unit and subsequent acylation (3 steps), overall yields are given in parentheses.

<sup>b</sup>The HPLC purities are reported at 230 nm. <sup>c</sup>The values correspond to [M+Na]<sup>+</sup>. <sup>d</sup>The values correspond to [M+2H]<sup>2+</sup>

**Supplementary Table 4 | Characterization data for compounds 10d–12**

| Comp | Formula                                                         | Yield | MS: <i>m/z</i> for [M+H] <sup>+</sup><br>(calcd./obs.) | HRMS: <i>m/z</i> for [M+Na] <sup>+</sup><br>[calcd./obs. ( $\Delta M$ )] | HPLC<br>[ <i>t<sub>R</sub></i> /min] | HPLC<br>[%Purity] <sup>a</sup> |
|------|-----------------------------------------------------------------|-------|--------------------------------------------------------|--------------------------------------------------------------------------|--------------------------------------|--------------------------------|
| 10d  | C <sub>92</sub> H <sub>95</sub> N <sub>7</sub> O <sub>7</sub>   | 2.0   | 1410.7/1410.7                                          | 1425.7726/1425.7697 (3.4)                                                | 16.59                                | >95                            |
| 10e  | C <sub>92</sub> H <sub>95</sub> N <sub>7</sub> O <sub>7</sub>   | 8.2   | 1369.8 / 1369.8                                        | 1390.7080/1390.7080 (0.0)                                                | 11.51                                | >95                            |
| 11   | C <sub>107</sub> H <sub>110</sub> N <sub>8</sub> O <sub>8</sub> | 6.4   | 1595.1 / 1595.8                                        | 1616.8267/1616.8265 (0.1)                                                | 12.26                                | >95                            |
| 12   | C <sub>122</sub> H <sub>125</sub> N <sub>9</sub> O <sub>9</sub> | 3.5   | 1820.4 / 1820.8                                        | 1841.9420/1841.9424 (0.2)                                                | 13.36                                | >95                            |

<sup>a</sup>The HPLC purities are reported at 230 nm. <sup>b</sup>The values correspond to [M+2H]<sup>2+</sup>

## Supplementary References

1. Macrae, C. F., *et al.* *J. Appl. Crystallogr.* **41**, 466–470 (2008).
2. Baldauf, C., Guenther, R., & Hofmann H.-J., *Phys. Biol.* **3**, S1–S9 (2006).
